# Supplementary material for: The crystal structures and mechanical properties of the uranyl carbonate minerals roubaultite, fontanite, sharpite, widenmannite, grimselite and čejkaite
Source: Royal Society of Chemistry journal article supplement (doi:10.1039/d0qi00933d), 2020-01-01
Supplement: d0qi00933d1.pdf [file d0qi00933d1.pdf]

## SUPPLEMENTARY INFORMATION

# The crystal structures and mechanical properties of the uranyl carbonate minerals roubaultite, fontanite, sharpite, widenmannite, grimselite and čejkaite

Francisco Colmenero,<sup>a</sup> Jakub Plášil,<sup>b</sup> Jiří Sejkora<sup>c</sup>

<sup>a</sup>*Instituto de Estructura de la Materia (IEM-CSIC). C/ Serrano, 113. 28006 – Madrid, Spain.*

<sup>b</sup>*Institute of Physics ASCR, v.v.i., Na Slovance 2, 182 21, Praha 8, Czech Republic.*

<sup>c</sup>*Mineralogicko-petrologické oddělení, Národní muzeum, Cirkusová 1740, 193 00 Praha 9, Czech Republic.*

| <b>Contents:</b>                                                                                    | <b>Page</b> |
|-----------------------------------------------------------------------------------------------------|-------------|
| (1) Table S.1. Material data and calculation parameters for the selected uranyl carbonate minerals. | S.3         |
| (2) Table S.2. Interatomic distances in roubaultite.                                                | S.4         |
| (3) Table S.3. Interatomic angles in roubaultite.                                                   | S.5         |
| (4) Table S.4. Most intense reflections in the X-ray diffraction pattern of roubaultite.            | S.6         |
| (5) Table S.5. Interatomic distances in fontanite.                                                  | S.7         |
| (6) Table S.6. Interatomic angles in fontanite.                                                     | S.8         |
| (7) Table S.7. Hydrogen bond parameters in fontanite.                                               | S.9         |
| (8) Table S.8. Most intense reflections in the X-ray diffraction pattern of fontanite.              | S.10        |
| (9) Table S.9. Interatomic distances in sharpite.                                                   | S.11        |
| (10) Table S.10. Interatomic angles in sharpite.                                                    | S.12        |
| (11) Table S.11. Most intense reflections in the X-ray diffraction pattern of sharpite.             | S.13        |
| (12) Table S.12. Interatomic distances in widenmannite.                                             | S.14        |
| (13) Table S.13. Interatomic angles in widenmannite.                                                | S.15        |
| (14) Table S.14. Most intense reflections in the X-ray diffraction pattern of widenmannite.         | S.16        |
| (15) Table S.15. Interatomic distances in grimselite.                                               | S.17        |
| (16) Table S.16. Hydrogen bond parameters in grimselite.                                            | S.18        |
| (17) Table S.17. Most intense reflections in the X-ray diffraction pattern of grimselite.           | S.19        |

|      |                                                                                                       |      |
|------|-------------------------------------------------------------------------------------------------------|------|
| (18) | Table S.18. Interatomic distances in čejkaite.                                                        | S.20 |
| (19) | Table S.19. Most intense reflections in the X-ray diffraction pattern of čejkaite.                    | S.21 |
| (20) | Figs. S.1 to S.2. 2D projections of the 3D representations of the elastic properties of sharpite.     | S.22 |
| (21) | Figs. S.3 to S.4. 2D projections of the 3D representations of the elastic properties of widenmannite. | S.24 |
| (22) | Figs. S.5 to S.6. 2D projections of the 3D representations of the elastic properties of grimselite.   | S.26 |
| (23) | Figs. S.7 to S.8. 2D projections of the 3D representations of the elastic properties of čejkaite .    | S.28 |
| (24) | Table S.20. Unit cell volume and parameters of roubaultite under external anisotropic pressures.      | S.30 |
| (25) | Table S.21. Calculated compressibilities of roubaultite under external anisotropic pressures.         | S.31 |
| (26) | Table S.22. Unit cell volume and parameters of fontanite under external anisotropic pressures.        | S.32 |
| (27) | Table S.23. Calculated compressibilities of fontanite under external anisotropic pressures.           | S.33 |
| (28) | Fig. S.9. Views of the computed unit cell of fontanite under two different anisotropic pressures.     | S.34 |
| (29) | Table S.24. Unit cell volume and parameters of sharpite under external isotropic pressures.           | S.35 |
| (30) | Table S.25. Calculated compressibilities of sharpite under external isotropic pressures.              | S.36 |
| (31) | References                                                                                            | S.37 |

**Table S.1.** Material data and calculation parameters for the selected uranyl carbonate minerals.

| Mineral                   | Structural formula                             | Crystal system | Space group        | $\epsilon$ (eV) | $k$ -mesh             |
|---------------------------|------------------------------------------------|----------------|--------------------|-----------------|-----------------------|
| Roubaultite <sup>1</sup>  | $Cu_2[(UO_2)_3(CO_3)_2O_2(OH)_2] \cdot 4 H_2O$ | Triclinic      | $P\bar{1}$ (no. 2) | 1000            | $2 \times 2 \times 2$ |
| Fontanite <sup>2</sup>    | $Ca[(UO_2)_3(CO_3)_2O_2] \cdot 6 H_2O$         | Monoclinic     | $P2_1/n$ (no. 14)  | 950             | $3 \times 1 \times 1$ |
| Sharpite <sup>3</sup>     | $Ca[(UO_2)_3(CO_3)_4] \cdot 3 H_2O$            | Orthorhombic   | $Cmcm$ (no. 63)    | 950             | $4 \times 1 \times 1$ |
| Widenmannite <sup>4</sup> | $Pb_2[(UO_2)(CO_3)_2(OH)_2]$                   | Orthorhombic   | $Pmmn$ (no. 59)    | 1000            | $5 \times 3 \times 3$ |
| Grimselite <sup>5</sup>   | $K_3Na[(UO_2)(CO_3)_3] \cdot H_2O$             | Hexagonal      | $P62c$ (no. 190)   | 1000            | $2 \times 2 \times 2$ |
| Čejkaite <sup>6</sup>     | $Na_4[(UO_2)(CO_3)_3]$                         | Monoclinic     | $C1c1$ (no. 9)     | 950             | $2 \times 1 \times 4$ |

**Table S.2.** Interatomic distances in roubaultite (in Å).

| Distance                                                            | Exp. <sup>1</sup> | Calc. |
|---------------------------------------------------------------------|-------------------|-------|
| <b>U1-O</b>                                                         |                   |       |
| U1-O1 × 2                                                           | 1.82(1)           | 1.844 |
| U1-O4 × 2                                                           | 2.55(1)           | 2.535 |
| U1-O5 × 2                                                           | 2.18(1)           | 2.185 |
| U1-O6 × 2                                                           | 2.58(1)           | 2.627 |
| <U1-Oap>                                                            | 1.82(1)           | 1.844 |
| <U1-Oeq>                                                            | 2.44(1)           | 2.449 |
| <b>U2-O</b>                                                         |                   |       |
| U2-O2                                                               | 1.81(1)           | 1.820 |
| U2-O3                                                               | 1.78(1)           | 1.806 |
| U2-O4                                                               | 2.45(1)           | 2.455 |
| U2-O5                                                               | 2.25(1)           | 2.250 |
| U2-O5'                                                              | 2.25(1)           | 2.271 |
| U2-O6                                                               | 2.44(1)           | 2.429 |
| U2-O8                                                               | 2.37(1)           | 2.319 |
| <U2-Oap>                                                            | 1.80(1)           | 1.813 |
| <U2-Oeq>                                                            | 2.35(1)           | 2.345 |
| <b>Cu-O</b>                                                         |                   |       |
| Cu-O7                                                               | 1.96(1)           | 2.016 |
| Cu-O7'                                                              | 2.52(1)           | 2.448 |
| Cu-O8'                                                              | 1.95(1)           | 1.969 |
| Cu-O8                                                               | 2.50(1)           | 2.742 |
| Cu-O9W                                                              | 1.98(1)           | 2.094 |
| Cu-O10W                                                             | 2.00(1)           | 2.079 |
| <Cu-O>                                                              | 2.15(1)           | 2.225 |
| <b>C-O</b>                                                          |                   |       |
| C-O4                                                                | 1.27(2)           | 1.295 |
| C-O6                                                                | 1.28(2)           | 1.290 |
| C-O7                                                                | 1.31(2)           | 1.280 |
| <C-O>                                                               | 1.29(2)           | 1.288 |
| <b>O-H</b>                                                          |                   |       |
| O8-H1                                                               | 1.05              | 0.989 |
| O9W-H2                                                              | 0.76              | 0.987 |
| O9W-H3                                                              | 0.93              | 0.989 |
| O10W-H5                                                             | 1.00              | 0.990 |
| O10W-H4                                                             | 0.73              | 0.975 |
| <b>Hydrogen bonds (O<sub>i</sub>-H<sub>j</sub>...O<sub>k</sub>)</b> |                   |       |
| O8...O3                                                             | 2.86              | 2.750 |
| H1...O3                                                             | 2.04              | 1.781 |
| O9W...O2                                                            | 2.76              | 2.712 |
| H3...O2'                                                            | 1.86              | 1.758 |
| O9W...O1                                                            | 2.77              | 2.777 |
| H2...O1                                                             | 2.02              | 1.792 |
| O10W...O9W                                                          | 3.23              | 3.102 |
| H4...O9W                                                            | 2.70              | 2.307 |
| O10W...O2                                                           | 3.05              | 2.982 |
| H4...O2                                                             | 2.39              | 2.292 |
| O10W...O1                                                           | 2.73              | 2.743 |
| H5...O1                                                             | 1.87              | 1.762 |

**Table S.3.** Interatomic angles in roubaultite (in degrees).

| Angle                                                               | Exp. <sup>1</sup> | Calc.  |
|---------------------------------------------------------------------|-------------------|--------|
| <b>O-U1-O</b>                                                       |                   |        |
| O1-U1-O1'                                                           | 180.00            | 180.00 |
| O1-U1-O4                                                            | 88.10             | 88.16  |
| O1-U1-O5                                                            | 90.89             | 90.05  |
| O1-U1-O6                                                            | 89.97             | 89.38  |
| O4-U1-O5                                                            | 65.29             | 65.07  |
| O5-U1-O6                                                            | 65.27             | 65.15  |
| O6-U1-O4'                                                           | 49.52             | 49.85  |
| <b>O-U2-O</b>                                                       |                   |        |
| O2-U2-O3                                                            | 177.20            | 177.16 |
| O2-U2-O4                                                            | 88.54             | 86.41  |
| O2-U2-O5                                                            | 91.08             | 90.94  |
| O2-U2-O5'                                                           | 92.46             | 92.54  |
| O2-U2-O6                                                            | 89.96             | 91.37  |
| O2-U2-O8                                                            | 86.08             | 87.29  |
| O4-U2-O5                                                            | 66.10             | 65.33  |
| O5-U2-O5'                                                           | 69.71             | 69.75  |
| O5'-U2-O6                                                           | 66.88             | 67.91  |
| O6-U2-O8                                                            | 78.25             | 79.25  |
| O8-U2-O4                                                            | 79.05             | 77.77  |
| <b>O-Cu-O</b>                                                       |                   |        |
| O8-Cu-O7'                                                           | 171.59            | 171.80 |
| O8-Cu-O7                                                            | 98.76             | 99.71  |
| O8-Cu-O9W                                                           | 84.68             | 77.15  |
| O8-Cu-O8'                                                           | 84.25             | 88.48  |
| O7-Cu-O9W                                                           | 89.82             | 92.60  |
| O9W-Cu-O8'                                                          | 88.81             | 88.93  |
| O8'-Cu-10W                                                          | 91.96             | 92.14  |
| <b>O-C-O</b>                                                        |                   |        |
| O4-C1-O6                                                            | 114.81            | 114.72 |
| O6-C1-O7                                                            | 123.39            | 124.17 |
| O7-C1-O4                                                            | 121.75            | 121.11 |
| <b>H-O-H</b>                                                        |                   |        |
| H2-O9W-H3                                                           | 98.71             | 107.21 |
| H4-O10W-H5                                                          | 112.91            | 105.41 |
| <b>Hydrogen bonds (O<sub>i</sub>-H<sub>j</sub>...O<sub>k</sub>)</b> |                   |        |
| O8-H1...O3                                                          | 132.26            | 165.98 |
| O9W-H3...O2'                                                        | 162.81            | 160.93 |
| O9W-H2...O1                                                         | 166.48            | 175.09 |
| O10W-H4...O9W                                                       | 131.37            | 138.04 |
| O10W-H4...O2                                                        | 148.88            | 126.93 |
| O10W-H5...O1                                                        | 143.09            | 170.68 |

**Table S.4.** Most intense reflections in the X-ray diffraction pattern of roubaultite: (a) X-ray pattern derived from the experimental crystal structure;<sup>1</sup> (b) X-ray pattern derived from the calculated crystal structure.

| $[hkl]$   | (a) Experimental <sup>1</sup> |         |         | (b) Calculated |         |                   |
|-----------|-------------------------------|---------|---------|----------------|---------|-------------------|
|           | $2\theta$ (°)                 | $d$ (Å) | $I$ (%) | $2\theta$ (°)  | $d$ (Å) | $\Delta(2\theta)$ |
| [0 -1 1]  | 15.918                        | 5.563   | 100.000 | 15.779         | 5.612   | -0.14             |
| [0 1 0]   | 11.406                        | 7.751   | 35.652  | 11.335         | 7.800   | -0.07             |
| [-2 1 0]  | 27.605                        | 3.229   | 22.332  | 27.333         | 3.260   | -0.27             |
| [-1 1 2]  | 28.004                        | 3.184   | 18.850  | 27.760         | 3.211   | -0.24             |
| [1 1 2]   | 29.461                        | 3.030   | 16.048  | 29.243         | 3.052   | -0.22             |
| [1 1 1]   | 21.415                        | 4.146   | 15.966  | 21.358         | 4.157   | -0.06             |
| [2 0 0]   | 25.780                        | 3.453   | 14.532  | 25.714         | 3.462   | -0.07             |
| [0 -2 1]  | 25.431                        | 3.500   | 14.435  | 25.242         | 3.525   | -0.19             |
| [0 0 1]   | 11.273                        | 7.843   | 14.429  | 11.155         | 7.925   | -0.12             |
| [-1 2 1]  | 28.047                        | 3.179   | 13.478  | 27.730         | 3.215   | -0.32             |
| [0 -2 2]  | 32.154                        | 2.782   | 12.078  | 31.868         | 2.806   | -0.29             |
| [-2 0 1]  | 27.801                        | 3.206   | 11.795  | 27.730         | 3.215   | -0.07             |
| [1 2 1]   | 29.739                        | 3.002   | 11.519  | 29.698         | 3.006   | -0.04             |
| [1 0 2]   | 26.548                        | 3.355   | 11.051  | 26.242         | 3.393   | -0.31             |
| [-1 1 1]  | 19.983                        | 4.440   | 10.884  | 19.790         | 4.483   | -0.19             |
| [1 0 0]   | 12.808                        | 6.906   | 10.603  | 12.776         | 6.924   | -0.03             |
| [2 1 0]   | 28.922                        | 3.085   | 10.232  | 29.004         | 3.076   | 0.08              |
| [-1 0 2]  | 25.665                        | 3.468   | 8.364   | 25.524         | 3.487   | -0.14             |
| [-2 -1 1] | 30.674                        | 2.912   | 7.833   | 30.779         | 2.903   | 0.11              |
| [2 -2 1]  | 35.801                        | 2.506   | 7.822   | 35.262         | 2.543   | -0.54             |

**Table S.5.** Interatomic distances in fontanite (in Å).

| Distance    | Exp. <sup>2</sup> | Calc. |
|-------------|-------------------|-------|
| <b>U1-O</b> |                   |       |
| U1-O3       | 1.77(3)           | 1.820 |
| U1-O12      | 1.83(3)           | 1.813 |
| U1-O7       | 2.21(3)           | 2.235 |
| U1-O11      | 2.23(3)           | 2.240 |
| U1-O10      | 2.54(3)           | 2.560 |
| U1-O6       | 2.53(3)           | 2.568 |
| U1-O9       | 2.56(3)           | 2.531 |
| U1-O13      | 2.57(3)           | 2.540 |
| <U1-Oap>    | 1.80(3)           | 1.817 |
| <U1-Oeq>    | 2.44(3)           | 2.446 |
| <b>U2-O</b> |                   |       |
| U2-O5       | 1.73(3)           | 1.817 |
| U2-O20      | 1.73(3)           | 1.834 |
| U2-O11      | 2.19(3)           | 2.227 |
| U2-O7       | 2.21(3)           | 2.222 |
| U2-O2       | 2.36(2)           | 2.370 |
| U2-O9       | 2.44(3)           | 2.459 |
| U2-O10      | 2.44(3)           | 2.429 |
| <U2-Oap>    | 1.73(3)           | 1.826 |
| <U2-Oeq>    | 2.33(3)           | 2.341 |
| <b>U3-O</b> |                   |       |
| U3-O1       | 1.73(3)           | 1.834 |
| U3-O14      | 1.76(3)           | 1.818 |
| U3-O7       | 2.28(3)           | 2.238 |
| U3-O11      | 2.28(3)           | 2.239 |
| U3-O8       | 2.40(3)           | 2.339 |
| U3-O6       | 2.42(3)           | 2.435 |
| U3-O13      | 2.45(2)           | 2.457 |
| <U1-Oap>    | 1.75(3)           | 1.826 |
| <U2-Oeq>    | 2.37(3)           | 2.342 |
| <b>Ca-O</b> |                   |       |
| Ca-O17W     | 2.42(4)           | 2.517 |
| Ca-O15W     | 2.47(4)           | 2.635 |
| Ca-O3       | 2.49(3)           | 2.417 |
| Ca-O18W     | 2.45(4)           | 2.438 |
| Ca-O5       | 2.52(4)           | 2.512 |
| Ca-O4W      | 2.56(4)           | 2.452 |
| Ca-O19W     | 2.56(5)           | 2.663 |
| Ca-O16W     | 2.57(4)           | 2.351 |
| <Ca-O>      | 2.51(4)           | 2.498 |
| <b>C1-O</b> |                   |       |
| C1-O8       | 1.28(4)           | 1.267 |
| C1-O9       | 1.27(4)           | 1.300 |
| C1-O10      | 1.33(4)           | 1.300 |
| <C1-O>      | 1.29(4)           | 1.289 |
| <b>C2-O</b> |                   |       |
| C2-O13      | 1.27(4)           | 1.297 |
| C2-O6       | 1.31(4)           | 1.296 |
| C2-O2       | 1.30(3)           | 1.274 |
| <C2-O>      | 1.29(4)           | 1.289 |
| <b>O-H</b>  |                   |       |
| O4W-H1      | -                 | 0.971 |
| O4W-H2      | -                 | 0.978 |
| O15W-H3     | -                 | 0.972 |
| O15W-H4     | -                 | 0.987 |
| O16w-H5     | -                 | 0.976 |
| O16w-H6     | -                 | 0.991 |
| O17w-H7     | -                 | 0.977 |
| O17w-H8     | -                 | 0.980 |
| O18w-H9     | -                 | 0.972 |
| O18w-H10    | -                 | 0.975 |
| O19w-H11    | -                 | 0.983 |
| O19w-H12    | -                 | 0.986 |

**Table S.6.** Interatomic angles in fontanite (in degrees).

| Angle         | Exp. <sup>2</sup> | Calc.  |
|---------------|-------------------|--------|
| <b>O-U1-O</b> |                   |        |
| O3-U1-O12     | 177.63            | 178.52 |
| O3-U1-O7      | 91.12             | 88.37  |
| O3-U1-O11     | 86.90             | 90.84  |
| O3-U1-O10     | 93.29             | 88.99  |
| O3-U1-O6      | 88.56             | 93.47  |
| O3-U1-O9      | 91.30             | 89.74  |
| O3-U1-O13     | 90.80             | 90.92  |
| <b>O-U2-O</b> |                   |        |
| O5-U2-O20     | 172.88            | 174.01 |
| O5-U2-O11     | 92.77             | 93.50  |
| O5-U2-O7      | 91.01             | 90.85  |
| O5-U2-O2      | 86.14             | 86.13  |
| O5-U2-O9      | 88.62             | 88.17  |
| O5-U2-O10     | 90.07             | 89.93  |
| <b>O-U3-O</b> |                   |        |
| O1-U3-O14     | 177.26            | 175.28 |
| O1-U3-O7      | 90.55             | 90.52  |
| O1-U3-O11     | 89.39             | 91.01  |
| O1-U3-O8      | 89.33             | 85.32  |
| O1-U3-O6      | 93.70             | 90.11  |
| O1-U3-O13     | 89.91             | 89.99  |
| <b>O-Ca-O</b> |                   |        |
| O17W-Ca-O15W  | 75.31             | 69.95  |
| O17W-Ca-O3    | 79.27             | 78.25  |
| O17W-Ca-O18W  | 145.75            | 149.31 |
| O17W-Ca-O5    | 104.28            | 121.42 |
| O17W-Ca-O4W   | 74.84             | 76.37  |
| O17W-Ca-O19W  | 141.76            | 125.54 |
| O17W-Ca-O16W  | 75.94             | 73.46  |
| <b>O-C1-O</b> |                   |        |
| O8-C1-O9      | 123.94            | 123.27 |
| O9-C1-O10     | 115.99            | 113.59 |
| O10-C1-O8     | 120.07            | 123.14 |
| <b>O-C2-O</b> |                   |        |
| O13-C2-O6     | 116.54            | 114.15 |
| O6-C2-O2      | 119.27            | 122.86 |
| O2-C2-O13     | 124.00            | 122.99 |
| <b>H-O-H</b>  |                   |        |
| H1-O4W-H2     | -                 | 104.89 |
| H3-O15W-H4    | -                 | 105.27 |
| H5-O16W-H6    | -                 | 104.69 |
| H7-O17W-H8    | -                 | 104.38 |
| H9-O18W-H10   | -                 | 107.21 |
| H11-O19W-H12  | -                 | 106.38 |



**Table S.7.** Hydrogen bond parameters (O1-H...O2) in fontanite (distances in Å and angles in degrees).

| <b>Hydrogen bond</b> | <b>O1...O2</b> | <b>H...O2</b> | <b><math>\alpha</math>(O1-H...O2)</b> |
|----------------------|----------------|---------------|---------------------------------------|
| O4W-H1...O1          | 2.977          | 2.207         | 135.42                                |
| O4W-H2...O4W         | 2.785          | 2.734         | 104.53                                |
| O15W-H3...O1         | 2.957          | 2.134         | 141.47                                |
| O15W-H4...O20        | 2.723          | 1.743         | 171.43                                |
| O16W-H5...O14        | 2.825          | 1.874         | 164.25                                |
| O16W-H6...O19W       | 2.705          | 1.716         | 174.82                                |
| O17W-H7...O20        | 2.896          | 1.960         | 159.41                                |
| O17W-H8...O1         | 2.824          | 1.875         | 162.21                                |
| O18W-H9...O14        | 3.097          | 2.161         | 161.16                                |
| O18W-H10...O2        | 2.938          | 2.016         | 156.81                                |
| O19W-H12...O12       | 2.739          | 1.757         | 173.19                                |

**Table S.8.** Most intense reflections in the X-ray diffraction pattern of fontanite: (a) X-ray pattern derived from the experimental crystal structure;<sup>2</sup> (b) X-ray pattern derived from the calculated crystal structure.

| $[hkl]$  | (a) Experimental <sup>2</sup> |         |         | (b) Calculated |         |                   |
|----------|-------------------------------|---------|---------|----------------|---------|-------------------|
|          | $2\theta$ (°)                 | $d$ (Å) | $I$ (%) | $2\theta$ (°)  | $d$ (Å) | $\Delta(2\theta)$ |
| [0 2 0]  | 10.232                        | 8.638   | 100.000 | 10.163         | 8.697   | -0.07             |
| [0 1 2]  | 12.592                        | 7.024   | 22.670  | 12.665         | 6.984   | 0.07              |
| [2 2 0]  | 27.585                        | 3.231   | 18.136  | 27.561         | 3.234   | -0.02             |
| [2 0 0]  | 25.547                        | 3.484   | 17.287  | 25.550         | 3.484   | 0.00              |
| [0 3 1]  | 16.424                        | 5.393   | 16.476  | 16.342         | 5.420   | -0.08             |
| [1 1 5]  | 32.222                        | 2.776   | 14.026  | 32.293         | 2.770   | 0.07              |
| [-1 2 3] | 23.857                        | 3.727   | 11.816  | 24.049         | 3.698   | 0.19              |
| [-1 1 5] | 32.196                        | 2.778   | 10.929  | 32.559         | 2.748   | 0.36              |
| [0 4 0]  | 20.547                        | 4.319   | 10.800  | 20.406         | 4.349   | -0.14             |
| [1 2 3]  | 23.878                        | 3.724   | 10.402  | 23.838         | 3.730   | -0.04             |
| [0 1 1]  | 7.691                         | 11.486  | 9.147   | 7.703          | 11.468  | 0.01              |
| [0 0 2]  | 11.500                        | 7.689   | 8.769   | 11.595         | 7.626   | 0.10              |
| [-1 0 3] | 21.493                        | 4.131   | 8.313   | 21.738         | 4.085   | 0.25              |
| [0 3 2]  | 19.241                        | 4.609   | 7.716   | 19.215         | 4.616   | -0.03             |

**Table S.9.** Interatomic distances in sharpite (in Å).

| Distance                                                            | Exp. <sup>3</sup> | Calc. |
|---------------------------------------------------------------------|-------------------|-------|
| <b>U1-O</b>                                                         |                   |       |
| U1-O2                                                               | 1.756(15)         | 1.790 |
| U1-O5                                                               | 1.764(17)         | 1.797 |
| U1-O1                                                               | 2.469(18)         | 2.499 |
| U1-O1'                                                              | 2.469(18)         | 2.499 |
| U1-O4                                                               | 2.531(9)          | 2.482 |
| U1-O4'                                                              | 2.531(9)          | 2.482 |
| U1-O6                                                               | 2.405(12)         | 2.713 |
| U1-O6'                                                              | 2.405(12)         | 2.713 |
| <U1-Oap>                                                            | 1.760(17)         | 1.794 |
| <U1-Oeq>                                                            | 2.468(18)         | 2.565 |
| <b>U2-O</b>                                                         |                   |       |
| U2-O3                                                               | 1.769(19)         | 1.825 |
| U2-O3'                                                              | 1.769(19)         | 1.825 |
| U2-O6                                                               | 2.442(11)         | 2.462 |
| U2-O6'                                                              | 2.442(11)         | 2.462 |
| U2-O6''                                                             | 2.442(11)         | 2.462 |
| U2-O6'''                                                            | 2.442(11)         | 2.462 |
| U2-O9                                                               | 2.4516(4)         | 2.492 |
| U2-O9'                                                              | 2.4516(4)         | 2.492 |
| <U2-Oap>                                                            | 1.769(19)         | 1.825 |
| <U2-Oeq>                                                            | 2.445(11)         | 2.472 |
| <b>Ca-O</b>                                                         |                   |       |
| Ca1-O4                                                              | 2.415(10)         | 2.442 |
| Ca1-O4'                                                             | 2.415(10)         | 2.442 |
| Ca1-O4''                                                            | 2.415(10)         | 2.442 |
| Ca1-O4'''                                                           | 2.415(10)         | 2.442 |
| Ca1-O7W                                                             | 2.744(14)         | 2.835 |
| Ca1-O7W'                                                            | 2.744(14)         | 2.835 |
| Ca1-O8W                                                             | 2.380(2)          | 2.453 |
| Ca1-O8W'                                                            | 2.380(2)          | 2.453 |
| <Ca1-O>                                                             | 2.489(10)         | 2.543 |
| <b>C1-O</b>                                                         |                   |       |
| C1-O1                                                               | 1.340(2)          | 1.311 |
| C1-O4                                                               | 1.258(13)         | 1.280 |
| C1-O4'                                                              | 1.258(13)         | 1.280 |
| <C1-O>                                                              | 1.285(13)         | 1.290 |
| <b>C2-O</b>                                                         |                   |       |
| C2-O6                                                               | 1.293(16)         | 1.221 |
| C2-O6'                                                              | 1.293(4)          | 1.221 |
| C2-O9                                                               | 1.640(4)          | 1.613 |
| <C2-O>                                                              | 1.409(16)         | 1.352 |
| <b>O-H</b>                                                          |                   |       |
| O7W-H7                                                              | -                 | 0.985 |
| O7W-H7'                                                             | -                 | 0.985 |
| O8W-H8                                                              | -                 | 0.978 |
| O8W-H8'                                                             | -                 | 0.978 |
| <b>Hydrogen bonds (O<sub>i</sub>-H<sub>j</sub>...O<sub>k</sub>)</b> |                   |       |
| O7W...O5                                                            | -                 | 2.826 |
| H7...O5                                                             | -                 | 1.878 |
| O8W...O3                                                            | -                 | 3.038 |
| H8...O3                                                             | -                 | 2.087 |

**Table S.10.** Interatomic angles in sharpite (in degrees).

| Angle                                                               | Exp. <sup>3</sup> | Calc.  |
|---------------------------------------------------------------------|-------------------|--------|
| <b>O-U1-O</b>                                                       |                   |        |
| O2-U1-O5                                                            | 178.82            | 177.83 |
| O2-U1-O1                                                            | 90.42             | 90.13  |
| O2-U1-O1'                                                           | 90.42             | 90.13  |
| O2-U1-O4                                                            | 88.91             | 88.38  |
| O2-U1-O4'                                                           | 88.91             | 88.38  |
| O2-U1-O6                                                            | 91.25             | 92.38  |
| O2-U1-O6'                                                           | 91.25             | 92.38  |
| <b>O-U2-O</b>                                                       |                   |        |
| O3-U2-O3'                                                           | 180.00            | 180.00 |
| O3-U2-O6                                                            | 91.65             | 94.63  |
| O3-U2-O6'                                                           | 91.65             | 94.63  |
| O3-U2-O6''                                                          | 88.35             | 85.37  |
| O3-U2-O6'''                                                         | 88.35             | 85.37  |
| O3-U2-O9                                                            | 90.00             | 90.00  |
| O3-U2-O9'                                                           | 90.00             | 90.00  |
| <b>O-Ca-O</b>                                                       |                   |        |
| O4-Ca1-O4'                                                          | 113.24            | 108.95 |
| O4-Ca1-O4''                                                         | 65.93             | 67.09  |
| O4-Ca1-O4'''                                                        | 78.61             | 73.39  |
| O4-Ca1-O7W                                                          | 137.20            | 139.72 |
| O4-Ca1-O7W'                                                         | 76.24             | 77.97  |
| O4-Ca1-O8W                                                          | 79.32             | 74.41  |
| O4-Ca1-O8W'                                                         | 146.74            | 142.77 |
| <b>O-C1-O</b>                                                       |                   |        |
| O1-C1-O4                                                            | 115.14            | 116.82 |
| O4-C1-O4'                                                           | 129.65            | 126.35 |
| O4'-C1-O1                                                           | 115.14            | 116.82 |
| <b>O-C2-O</b>                                                       |                   |        |
| O6-C2-O6'                                                           | 138.29            | 137.35 |
| O6'-C2-O9                                                           | 110.84            | 111.29 |
| O9-C2-O6                                                            | 110.84            | 111.29 |
| <b>H-O-H</b>                                                        |                   |        |
| H7-O7W-H7'                                                          | -                 | 99.61  |
| H8-O8W-H8'                                                          | -                 | 105.11 |
| <b>Hydrogen bonds (O<sub>i</sub>-H<sub>j</sub>...O<sub>k</sub>)</b> |                   |        |
| O7W-H7...O5                                                         | -                 | 160.54 |
| O8W-H8...O3                                                         | -                 | 163.46 |

**Table S.11.** Most intense reflections in the X-ray diffraction pattern of sharpite: (a) X-ray pattern derived from the experimental crystal structure;<sup>3</sup> (b) X-ray pattern derived from the calculated crystal structure.

| [hkl]   | (a) Experimental <sup>3</sup> |         |         | (b) Calculated |         |                   |
|---------|-------------------------------|---------|---------|----------------|---------|-------------------|
|         | $2\theta$ (°)                 | $d$ (Å) | I (%)   | $2\theta$ (°)  | $d$ (Å) | $\Delta(2\theta)$ |
| [0 2 4] | 19.689                        | 4.505   | 100.000 | 19.598         | 4.526   | -0.09             |
| [0 0 2] | 8.016                         | 11.021  | 55.258  | 7.981          | 11.068  | -0.04             |
| [1 3 4] | 29.780                        | 2.998   | 48.187  | 29.506         | 3.025   | -0.27             |
| [1 1 1] | 19.378                        | 4.577   | 36.008  | 19.091         | 4.645   | -0.29             |
| [1 1 3] | 22.511                        | 3.947   | 31.381  | 22.237         | 3.995   | -0.27             |
| [2 2 4] | 41.919                        | 2.153   | 27.047  | 41.328         | 2.183   | -0.59             |
| [0 2 3] | 16.538                        | 5.356   | 25.335  | 16.460         | 5.381   | -0.08             |
| [1 3 3] | 27.744                        | 3.213   | 23.555  | 27.470         | 3.244   | -0.27             |
| [1 5 0] | 33.954                        | 2.638   | 21.459  | 33.663         | 2.660   | -0.29             |
| [1 1 2] | 20.606                        | 4.307   | 20.407  | 20.325         | 4.366   | -0.28             |
| [1 1 0] | 18.952                        | 4.679   | 19.697  | 18.662         | 4.751   | -0.29             |
| [0 2 2] | 13.869                        | 6.380   | 19.296  | 13.802         | 6.411   | -0.07             |
| [1 7 4] | 47.616                        | 1.908   | 18.788  | 47.277         | 1.921   | -0.34             |
| [1 5 8] | 47.689                        | 1.906   | 18.141  | 47.365         | 1.918   | -0.32             |
| [1 1 7] | 34.300                        | 2.612   | 17.355  | 34.029         | 2.633   | -0.27             |
| [2 0 0] | 36.625                        | 2.452   | 15.284  | 36.014         | 2.492   | -0.61             |
| [0 4 0] | 22.711                        | 3.912   | 15.000  | 22.593         | 3.932   | -0.12             |
| [0 2 0] | 11.300                        | 7.825   | 11.948  | 11.241         | 7.865   | -0.06             |
| [0 4 7] | 36.604                        | 2.453   | 11.787  | 36.429         | 2.464   | -0.17             |
| [0 2 6] | 26.788                        | 3.325   | 10.708  | 26.667         | 3.340   | -0.12             |
| [2 0 8] | 49.743                        | 1.832   | 9.921   | 49.165         | 1.852   | -0.58             |
| [0 6 7] | 45.102                        | 2.009   | 9.792   | 44.873         | 2.018   | -0.23             |
| [0 4 3] | 25.779                        | 3.453   | 9.645   | 25.649         | 3.470   | -0.13             |
| [1 3 2] | 26.201                        | 3.399   | 9.404   | 25.925         | 3.434   | -0.28             |
| [2 4 0] | 43.530                        | 2.077   | 9.001   | 42.935         | 2.105   | -0.59             |
| [0 4 8] | 39.992                        | 2.253   | 8.853   | 39.801         | 2.263   | -0.19             |
| [2 2 6] | 45.954                        | 1.973   | 8.429   | 45.372         | 1.997   | -0.58             |
| [0 4 2] | 24.120                        | 3.687   | 7.862   | 23.996         | 3.706   | -0.12             |
| [0 4 1] | 23.071                        | 3.852   | 7.486   | 22.951         | 3.872   | -0.12             |
| [0 0 8] | 32.471                        | 2.755   | 7.249   | 32.327         | 2.767   | -0.14             |
| [2 4 1] | 43.732                        | 2.068   | 7.175   | 43.138         | 2.095   | -0.59             |

**Table S.12.** Interatomic distances in widenmannite (in Å).

| Distance                                                            | Exp. <sup>4</sup> | Calc. |
|---------------------------------------------------------------------|-------------------|-------|
| <b>U1-O</b>                                                         |                   |       |
| U1-O3<br>× 2                                                        | 1.802(19)         | 1.784 |
| U1-O1 ×<br>2                                                        | 2.4895(11)        | 2.485 |
| U1-O2 ×<br>2                                                        | 2.43(3)           | 2.466 |
| U1-O4 ×<br>2                                                        | 2.46(3)           | 2.464 |
| <U1-Oap>                                                            | 1.80(2)           | 1.784 |
| <U1-Oeq>                                                            | 2.46(3)           | 2.472 |
| <b>Pb-O</b>                                                         |                   |       |
| Pb-O6                                                               | 2.35(4)           | 2.303 |
| Pb-O6' ×<br>2                                                       | 2.683(16)         | 2.607 |
| Pb-O2 ×<br>2                                                        | 3.089(17)         | 3.117 |
| Pb-O3 ×<br>2                                                        | 3.42(4)           | 3.457 |
| Pb-O4 ×<br>2                                                        | 2.781(11)         | 2.789 |
| Pb-O5                                                               | 2.574(18)         | 2.625 |
| Pb-O1                                                               | 3.37(2)           | 3.499 |
| <Pb-O>                                                              | 2.93(4)           | 2.942 |
| <b>C1-O</b>                                                         |                   |       |
| C1-O1                                                               | 1.30(4)           | 1.321 |
| C1-O2 ×<br>2                                                        | 1.29(3)           | 1.278 |
| <C1-O>                                                              | 1.29(4)           | 1.292 |
| <b>C2-O</b>                                                         |                   |       |
| C2-O5                                                               | 1.30(4)           | 1.273 |
| C2-O4 ×<br>2                                                        | 1.31(3)           | 1.305 |
| <C2-O>                                                              | 1.31(4)           | 1.294 |
| <b>O-H</b>                                                          |                   |       |
| O6-H1                                                               | 0.819             | 0.970 |
| <b>Hydrogen bonds (O<sub>i</sub>-H<sub>j</sub>...O<sub>k</sub>)</b> |                   |       |
| O6...O2                                                             | 3.190             | 3.294 |
| H1...O2                                                             | 2.564             | 2.679 |
| O6...O4                                                             | 3.200             | 3.422 |
| H1...O4                                                             | 3.162             | 3.116 |

**Table S.13.** Interatomic angles in widdenmannite (in degrees).

| Angle                                                               | Exp. <sup>4</sup> | Calc.   |
|---------------------------------------------------------------------|-------------------|---------|
| <b>O-U1-O</b>                                                       |                   |         |
| O3-U1-O3'                                                           | 179.26            | 177.368 |
| O3-U1-O1 ×<br>2                                                     | 90.01             | 90.087  |
| O3-U1-O2 ×<br>2                                                     | 90.31             | 91.104  |
| O3-U1-O4 ×<br>2                                                     | 89.67             | 88.822  |
| O1-U1-O4                                                            | 64.089            | 67.324  |
| O4-U1-O4'                                                           | 54.999            | 52.597  |
| O4'-U1-O1'                                                          | 64.089            | 67.324  |
| O1'-U1-O2                                                           | 54.203            | 53.523  |
| O2-U1-O2'                                                           | 68.419            | 65.949  |
| O2'-U1-O1                                                           | 54.203            | 53.223  |
| <b>O-Pb-O</b>                                                       |                   |         |
| O6-Pb-O6'                                                           | 76.07             | 75.973  |
| O6-Pb-O2 ×<br>2                                                     | 135.28            | 130.632 |
| O6-Pb-O3 ×<br>2                                                     | 125.14            | 128.728 |
| O6-Pb-O4 ×<br>2                                                     | 76.68             | 86.854  |
| O6-Pb-O5                                                            | 79.02             | 74.683  |
| O6-Pb-O1                                                            | 116.56            | 125.453 |
| <b>O-C1-O</b>                                                       |                   |         |
| O1-C1-O2                                                            | 119.94            | 117.121 |
| O2-C1-O2'                                                           | 120.11            | 125.759 |
| O2'-C1-O1                                                           | 119.94            | 117.121 |
| <b>O-C2-O</b>                                                       |                   |         |
| O5-C1-O4                                                            | 119.96            | 122.670 |
| O4-C1-O4'                                                           | 120.08            | 114.660 |
| O4'-C1-O5                                                           | 119.96            | 122.670 |
| <b>Hydrogen bonds (O<sub>i</sub>-H<sub>j</sub>...O<sub>k</sub>)</b> |                   |         |
| O6-H1...O2                                                          | 134.198           | 121.768 |
| O6-H1'...O4                                                         | 85.270            | 100.084 |

**Table S.14.** Most intense reflections in the X-ray diffraction pattern of widenmannite: (a) X-ray pattern derived from the experimental crystal structure;<sup>4</sup> (b) X-ray pattern derived from the calculated crystal structure.

| [hkl]   | (a) Experimental <sup>4</sup> |         |         | (b) Calculated |         |                   |
|---------|-------------------------------|---------|---------|----------------|---------|-------------------|
|         | $2\theta$ (°)                 | $d$ (Å) | I (%)   | $2\theta$ (°)  | $d$ (Å) | $\Delta(2\theta)$ |
| [1 2 1] | 27.940                        | 3.191   | 100.000 | 27.716         | 3.216   | -0.22             |
| [0 2 1] | 21.355                        | 4.158   | 82.522  | 21.012         | 4.225   | -0.34             |
| [1 0 2] | 26.752                        | 3.330   | 74.786  | 26.621         | 3.346   | -0.13             |
| [1 1 0] | 20.178                        | 4.397   | 36.844  | 20.158         | 4.402   | -0.02             |
| [1 2 4] | 48.571                        | 1.873   | 31.106  | 48.037         | 1.893   | -0.53             |
| [2 0 0] | 36.063                        | 2.489   | 29.738  | 36.193         | 2.480   | 0.13              |
| [0 2 2] | 27.502                        | 3.241   | 29.629  | 27.104         | 3.287   | -0.40             |
| [0 4 0] | 38.324                        | 2.347   | 28.495  | 37.648         | 2.387   | -0.68             |
| [1 4 2] | 47.354                        | 1.918   | 25.718  | 46.703         | 1.943   | -0.65             |
| [1 1 1] | 22.506                        | 3.947   | 24.154  | 22.436         | 3.960   | -0.07             |
| [1 0 1] | 20.396                        | 4.351   | 22.702  | 20.394         | 4.351   | 0.00              |
| [2 2 1] | 42.293                        | 2.135   | 22.464  | 42.223         | 2.139   | -0.07             |
| [0 0 3] | 29.894                        | 2.987   | 19.784  | 29.538         | 3.022   | -0.36             |
| [2 2 2] | 45.944                        | 1.974   | 17.474  | 45.796         | 1.980   | -0.15             |
| [1 0 3] | 35.011                        | 2.561   | 16.591  | 34.736         | 2.581   | -0.28             |
| [0 2 3] | 35.602                        | 2.520   | 15.040  | 35.117         | 2.553   | -0.48             |
| [0 1 2] | 21.967                        | 4.043   | 13.472  | 21.686         | 4.095   | -0.28             |
| [2 1 2] | 42.628                        | 2.119   | 13.321  | 42.587         | 2.121   | -0.04             |
| [0 1 1] | 13.652                        | 6.481   | 12.355  | 13.457         | 6.575   | -0.19             |
| [2 4 0] | 53.639                        | 1.707   | 11.430  | 53.215         | 1.720   | -0.42             |
| [0 1 3] | 31.407                        | 2.846   | 8.798   | 31.017         | 2.881   | -0.39             |
| [2 0 3] | 47.521                        | 1.912   | 8.134   | 47.385         | 1.917   | -0.14             |
| [0 1 4] | 41.409                        | 2.179   | 8.108   | 40.894         | 2.205   | -0.52             |
| [1 1 2] | 28.419                        | 3.138   | 7.823   | 28.239         | 3.158   | -0.18             |
| [2 2 3] | 51.578                        | 1.771   | 7.318   | 51.317         | 1.779   | -0.26             |
| [2 1 3] | 48.559                        | 1.873   | 7.087   | 48.391         | 1.880   | -0.17             |



**Table S.15.** Interatomic distances in grimselite (in Å).

| Distance    | Exp. <sup>5</sup> | Calc. |
|-------------|-------------------|-------|
| <b>U-O</b>  |                   |       |
| U-O3        | 1.785(8)          | 1.822 |
| U-O3'       | 1.785(8)          | 1.824 |
| U-O2        | 2.425(4)          | 2.435 |
| U-O2'       | 2.425(4)          | 2.442 |
| U-O2''      | 2.43(2)           | 2.488 |
| U-O4        | 2.408(7)          | 2.405 |
| U-O4'       | 2.408(8)          | 2.409 |
| U-O4''      | 2.41(1)           | 2.422 |
| <U-Oap>     | 1.785(8)          | 1.823 |
| <U-Oeq>     | 2.418(8)          | 2.434 |
| <b>K-O</b>  |                   |       |
| K-O1        | 2.809(9)          | 2.722 |
| K-O1'       | 2.809(9)          | 2.731 |
| K-O2        | 2.730(6)          | 2.689 |
| K-O2'       | 2.730(7)          | 2.698 |
| K-O4        | 2.869(5)          | 2.778 |
| K-O4'       | 2.869(7)          | 2.796 |
| K-O5W       | 2.925(8)          | 3.060 |
| K-O5W'      | 2.925(8)          | 3.064 |
| <K-O>       | 2.826(9)          | 2.817 |
| <b>Na-O</b> |                   |       |
| Na-O1       | 2.945(4)          | 2.872 |
| Na-O1'      | 2.945(4)          | 2.919 |
| Na-O1''     | 2.95(2)           | 2.956 |
| Na-O3       | 2.362(8)          | 2.385 |
| Na-O3'      | 2.362(8)          | 2.391 |
| Na-O4       | 2.45(1)           | 2.463 |
| Na-O4'      | 2.45(1)           | 2.522 |
| Na-O4''     | 2.45(1)           | 2.538 |
| <Na-O>      | 2.615(8)          | 2.631 |
| <b>C-O</b>  |                   |       |
| C-O1        | 1.35(2)           | 1.318 |
| C-O2        | 1.30(2)           | 1.301 |
| C-O4        | 1.25(1)           | 1.271 |
| <C-O>       | 1.298(2)          | 1.297 |
| <b>O-H</b>  |                   |       |
| O5W-H1      | -                 | 0.980 |
| O5W-H1'     | -                 | 0.976 |

**Table S.16.** Hydrogen bond parameters (O1-H...O2) in grimselite (distances in Å and angles in degrees).

| <b>Hydrogen bond</b> | <b>O1...O2</b> | <b>H...O2</b> | <b><math>\alpha</math>(O1-H...O2)</b> |
|----------------------|----------------|---------------|---------------------------------------|
| O5W-H1...O4          | 3.039          | 2.092         | 161.748                               |
| O5W-H1'...O4'        | 3.162          | 2.242         | 156.285                               |

**Table S.17.** Most intense reflections in the X-ray diffraction pattern of grimselite: (a) X-ray pattern derived from the experimental crystal structure;<sup>5</sup> (b) X-ray pattern derived from the calculated crystal structure.

| [hkl]   | (a) Experimental <sup>5</sup> |         |        | (b) Calculated |         |                   |
|---------|-------------------------------|---------|--------|----------------|---------|-------------------|
|         | $2\theta$ (°)                 | $d$ (Å) | I (%)  | $2\theta$ (°)  | $d$ (Å) | $\Delta(2\theta)$ |
| [1 0 1] | 15.36                         | 5.77    | 100.00 | 15.08          | 5.87    | -0.28             |
| [1 0 0] | 10.98                         | 8.06    | 42.03  | 11.11          | 7.96    | 0.13              |
| [1 1 2] | 28.91                         | 3.09    | 41.48  | 28.52          | 3.13    | -0.39             |
| [3 0 0] | 33.37                         | 2.69    | 31.23  | 33.76          | 2.65    | 0.39              |
| [1 1 0] | 19.08                         | 4.65    | 28.15  | 18.93          | 4.68    | -0.15             |
| [2 1 1] | 31.31                         | 2.86    | 27.94  | 31.18          | 2.87    | -0.13             |
| [2 0 1] | 24.59                         | 3.62    | 27.29  | 24.76          | 3.59    | 0.17              |
| [2 2 2] | 44.72                         | 2.03    | 21.05  | 44.26          | 2.05    | -0.46             |
| [1 0 2] | 24.22                         | 3.68    | 20.33  | 23.93          | 3.72    | -0.29             |
| [0 0 2] | 21.52                         | 4.13    | 18.12  | 21.09          | 4.21    | -0.43             |
| [2 2 0] | 38.72                         | 2.33    | 15.05  | 38.40          | 2.34    | -0.32             |
| [3 1 1] | 41.89                         | 2.16    | 14.53  | 41.90          | 2.15    | 0.01              |
| [1 0 3] | 34.42                         | 2.61    | 10.46  | 33.89          | 2.64    | -0.53             |
| [2 0 0] | 22.07                         | 4.03    | 10.38  | 22.32          | 3.98    | 0.25              |
| [3 2 1] | 50.61                         | 1.80    | 10.22  | 50.39          | 1.81    | -0.22             |
| [2 1 0] | 29.33                         | 3.04    | 9.39   | 28.92          | 3.08    | -0.41             |
| [3 1 2] | 46.20                         | 1.97    | 8.45   | 46.74          | 1.94    | 0.54              |
| [3 0 4] | 56.19                         | 1.64    | 8.34   | 55.81          | 1.65    | -0.38             |

**Table S.18.** Interatomic distances in čejkaite (in Å).

| Distance     | Exp. <sup>6</sup> | Calc. |
|--------------|-------------------|-------|
| <b>U-O</b>   |                   |       |
| U-O10        | 1.841(11)         | 1.840 |
| U-O11        | 1.885(11)         | 1.840 |
| U-O2         | 2.377(17)         | 2.374 |
| U-O1         | 2.402(17)         | 2.381 |
| U-O9'        | 2.434(15)         | 2.389 |
| U-O5         | 2.447(15)         | 2.389 |
| U-O7         | 2.426(13)         | 2.389 |
| U-O6         | 2.421(15)         | 2.390 |
| <U-Oap>      | 1.86              | 1.840 |
| <U-Oeq>      | 2.42              | 2.385 |
| <b>Na1-O</b> |                   |       |
| Na1-O4       | 2.39(3)           | 2.418 |
| Na1-O3       | 2.40(3)           | 2.434 |
| Na1-O8       | 2.41(3)           | 2.396 |
| Na1-O3'      | 2.52(2)           | 2.517 |
| Na1-O4'      | 2.55(3)           | 2.538 |
| Na1-O8'      | 2.62(3)           | 2.606 |
| <Na1-O>      | 2.48              | 2.485 |
| <b>Na2-O</b> |                   |       |
| Na2-O6       | 2.313(17)         | 2.378 |
| Na2-O8       | 2.656(15)         | 2.345 |
| Na2-O2       | 2.31(2)           | 2.331 |
| Na2-O11      | 2.33(2)           | 2.540 |
| Na2-O10      | 2.443(18)         | 2.434 |
| Na2-O5       | 2.656(15)         | 2.658 |
| <Na2-O>      | 2.39              | 2.448 |
| <b>Na3-O</b> |                   |       |
| Na3-O5       | 2.251(17)         | 2.341 |
| Na3-O3       | 2.314(18)         | 2.340 |
| Na3-O9       | 2.333(18)         | 2.372 |
| Na3-O11      | 2.501(19)         | 2.487 |
| Na3-O10      | 2.506(19)         | 2.472 |
| Na3-O2       | 2.918(17)         | 2.897 |
| <Na3-O>      | 2.47              | 2.485 |
| <b>Na4-O</b> |                   |       |
| Na4-O4       | 2.292(19)         | 2.339 |
| Na4-O7       | 2.335(16)         | 2.353 |
| Na4-O1       | 2.340(19)         | 2.347 |
| Na4-O10      | 2.507(19)         | 2.475 |
| Na4-O11      | 2.561(19)         | 2.501 |
| Na4-O1'      | 2.794(16)         | 2.792 |
| <Na4-O>      | 2.47              | 2.468 |
| <b>C1-O</b>  |                   |       |
| C1-O3        | 1.22(3)           | 1.261 |
| C1-O6        | 1.29(3)           | 1.305 |
| C1-O1        | 1.34(3)           | 1.318 |
| <C1-O>       | 1.28              | 1.295 |
| <b>C2-O</b>  |                   |       |
| C2-O4        | 1.23(2)           | 1.260 |
| C2-O2        | 1.27(3)           | 1.315 |
| C2-O9        | 1.35(3)           | 1.306 |
| <C2-O>       | 1.28              | 1.294 |
| <b>C3-O</b>  |                   |       |
| C3-O8        | 1.21(3)           | 1.259 |
| C3-O7        | 1.30(3)           | 1.307 |
| C3-O5        | 1.37(3)           | 1.317 |
| <C3-O>       | 1.29              | 1.294 |

**Table S.19.** Most intense reflections in the X-ray diffraction pattern of čejkaite: (a) X-ray pattern derived from the experimental crystal structure;<sup>6</sup> (b) X-ray pattern derived from the calculated crystal structure.

| $[hkl]$   | (a) Experimental <sup>6</sup> |         |         | (b) Calculated |         |                   |
|-----------|-------------------------------|---------|---------|----------------|---------|-------------------|
|           | $2\theta$ (°)                 | $d$ (Å) | $I$ (%) | $2\theta$ (°)  | $d$ (Å) | $\Delta(2\theta)$ |
| [1 1 1]   | 17.806                        | 4.977   | 100.000 | 17.675         | 5.014   | -0.13             |
| [1 3 0]   | 19.084                        | 4.647   | 94.622  | 19.043         | 4.657   | -0.04             |
| [0 2 1]   | 17.620                        | 5.030   | 85.711  | 17.516         | 5.059   | -0.10             |
| [-1 1 1]  | 17.438                        | 5.082   | 72.782  | 17.349         | 5.108   | -0.09             |
| [0 0 2]   | 27.674                        | 3.221   | 70.550  | 27.437         | 3.248   | -0.24             |
| [1 1 0]   | 10.988                        | 8.046   | 66.692  | 10.957         | 8.068   | -0.03             |
| [2 0 0]   | 19.093                        | 4.645   | 47.345  | 19.033         | 4.659   | -0.06             |
| [3 3 0]   | 33.383                        | 2.682   | 38.530  | 33.287         | 2.690   | -0.10             |
| [0 2 0]   | 10.983                        | 8.050   | 33.663  | 10.962         | 8.065   | -0.02             |
| [0 4 1]   | 26.085                        | 3.413   | 28.981  | 25.987         | 3.426   | -0.10             |
| [2 2 1]   | 26.346                        | 3.380   | 28.818  | 26.202         | 3.398   | -0.14             |
| [-2 -2 1] | 25.840                        | 3.445   | 28.214  | 25.753         | 3.457   | -0.09             |
| [2 6 0]   | 38.725                        | 2.323   | 27.234  | 38.638         | 2.328   | -0.09             |
| [-2 -4 1] | 32.320                        | 2.768   | 24.668  | 32.227         | 2.775   | -0.09             |
| [-3 -1 1] | 32.225                        | 2.776   | 24.378  | 32.126         | 2.784   | -0.10             |
| [1 5 1]   | 32.626                        | 2.742   | 22.067  | 32.509         | 2.752   | -0.12             |
| [-1 5 1]  | 32.419                        | 2.760   | 21.586  | 32.325         | 2.767   | -0.09             |
| [3 1 1]   | 32.846                        | 2.725   | 19.734  | 32.676         | 2.738   | -0.17             |
| [2 2 0]   | 22.078                        | 4.023   | 19.709  | 22.016         | 4.034   | -0.06             |
| [0 6 0]   | 33.367                        | 2.683   | 19.371  | 33.303         | 2.688   | -0.06             |
| [2 4 1]   | 32.735                        | 2.734   | 18.093  | 32.594         | 2.745   | -0.14             |
| [1 9 0]   | 52.021                        | 1.757   | 15.390  | 51.915         | 1.760   | -0.11             |
| [4 6 0]   | 52.040                        | 1.756   | 15.344  | 51.896         | 1.761   | -0.14             |
| [-4 -2 1] | 42.530                        | 2.124   | 15.261  | 42.406         | 2.130   | -0.12             |
| [1 1 3]   | 43.833                        | 2.064   | 15.078  | 43.439         | 2.082   | -0.39             |
| [-3 -5 1] | 42.602                        | 2.121   | 14.997  | 42.489         | 2.126   | -0.11             |
| [5 3 0]   | 52.051                        | 1.756   | 14.993  | 51.884         | 1.761   | -0.17             |
| [4 0 0]   | 38.744                        | 2.322   | 13.636  | 38.619         | 2.330   | -0.13             |
| [1 1 2]   | 30.080                        | 2.969   | 13.540  | 29.822         | 2.994   | -0.26             |
| [-1 7 1]  | 42.755                        | 2.113   | 13.443  | 42.647         | 2.118   | -0.11             |
| [1 7 1]   | 42.919                        | 2.106   | 12.185  | 42.792         | 2.112   | -0.13             |
| [3 5 1]   | 43.094                        | 2.097   | 11.639  | 42.925         | 2.105   | -0.17             |
| [4 2 1]   | 43.185                        | 2.093   | 10.563  | 42.986         | 2.102   | -0.20             |
| [0 2 3]   | 43.590                        | 2.075   | 10.300  | 43.225         | 2.091   | -0.37             |
| [0 2 2]   | 29.855                        | 2.990   | 10.237  | 29.626         | 3.013   | -0.23             |
| [0 4 0]   | 22.068                        | 4.025   | 9.856   | 22.026         | 4.032   | -0.04             |
| [2 2 3]   | 48.437                        | 1.878   | 9.664   | 48.022         | 1.893   | -0.41             |
| [0 4 3]   | 47.983                        | 1.895   | 9.164   | 47.629         | 1.908   | -0.35             |
| [0 0 4]   | 57.152                        | 1.610   | 9.081   | 56.628         | 1.624   | -0.52             |
| [-2 4 3]  | 51.672                        | 1.768   | 8.700   | 51.361         | 1.778   | -0.31             |
| [3 3 2]   | 44.374                        | 2.040   | 8.545   | 44.086         | 2.053   | -0.29             |
| [-3 1 3]  | 51.465                        | 1.774   | 7.889   | 51.166         | 1.784   | -0.30             |
| [1 5 3]   | 52.304                        | 1.748   | 7.721   | 51.930         | 1.759   | -0.37             |
| [2 2 2]   | 36.061                        | 2.489   | 7.693   | 35.790         | 2.507   | -0.27             |
| [5 1 1]   | 51.820                        | 1.763   | 7.678   | 51.587         | 1.770   | -0.23             |
| [-2 2 3]  | 47.537                        | 1.911   | 7.557   | 47.223         | 1.923   | -0.31             |
| [-1 3 2]  | 33.635                        | 2.662   | 7.523   | 33.435         | 2.678   | -0.20             |
| [2 8 1]   | 51.581                        | 1.771   | 7.486   | 51.425         | 1.776   | -0.16             |
| [0 4 2]   | 35.674                        | 2.515   | 7.354   | 35.459         | 2.530   | -0.21             |
| [0 6 2]   | 43.882                        | 2.062   | 7.350   | 43.673         | 2.071   | -0.21             |
| [-3 -7 1] | 51.231                        | 1.782   | 7.196   | 51.103         | 1.786   | -0.13             |
| [-5 -1 1] | 51.108                        | 1.786   | 7.168   | 50.956         | 1.791   | -0.15             |
| [3 7 1]   | 51.658                        | 1.768   | 7.141   | 51.481         | 1.774   | -0.18             |
| [-2 2 2]  | 35.297                        | 2.541   | 7.048   | 35.112         | 2.554   | -0.18             |
| [-2 -8 1] | 51.296                        | 1.780   | 7.042   | 51.173         | 1.784   | -0.12             |

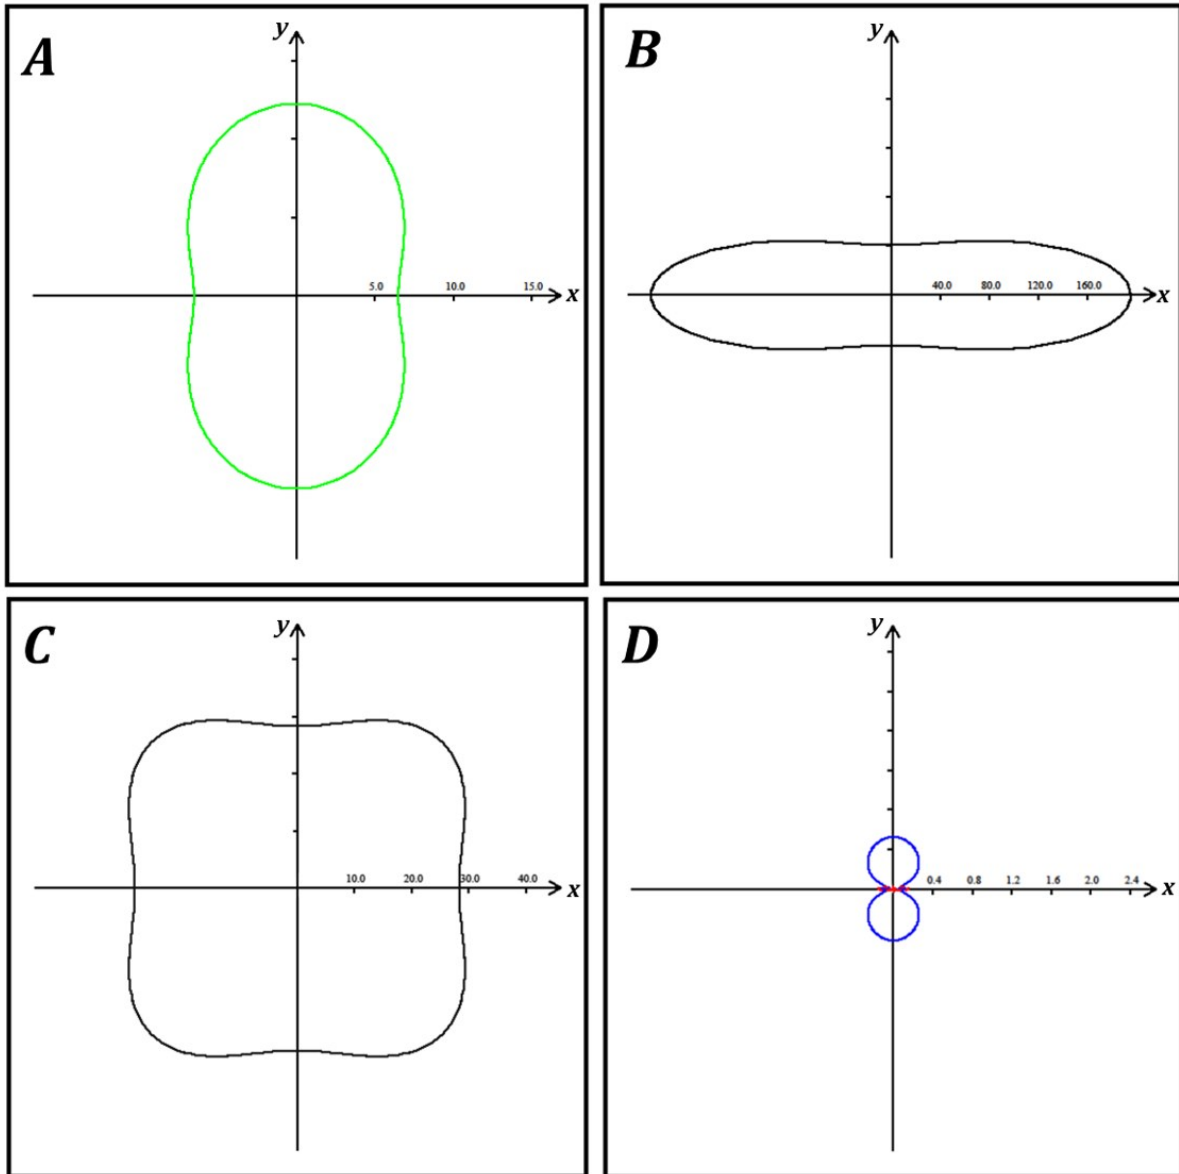

**Fig. S.1.** Two-dimensional projections in the  $xy$  plane of the tridimensional representations of the elastic properties of sharpite as a function of the orientation of the applied strain: (A) Compressibility; (B) Young modulus; (C) Maximum shear modulus; (D) Maximum (blue) and minimum (red) Poisson's ratio. The labels of the marks in the vertical axis are exactly the same as those of the horizontal one.

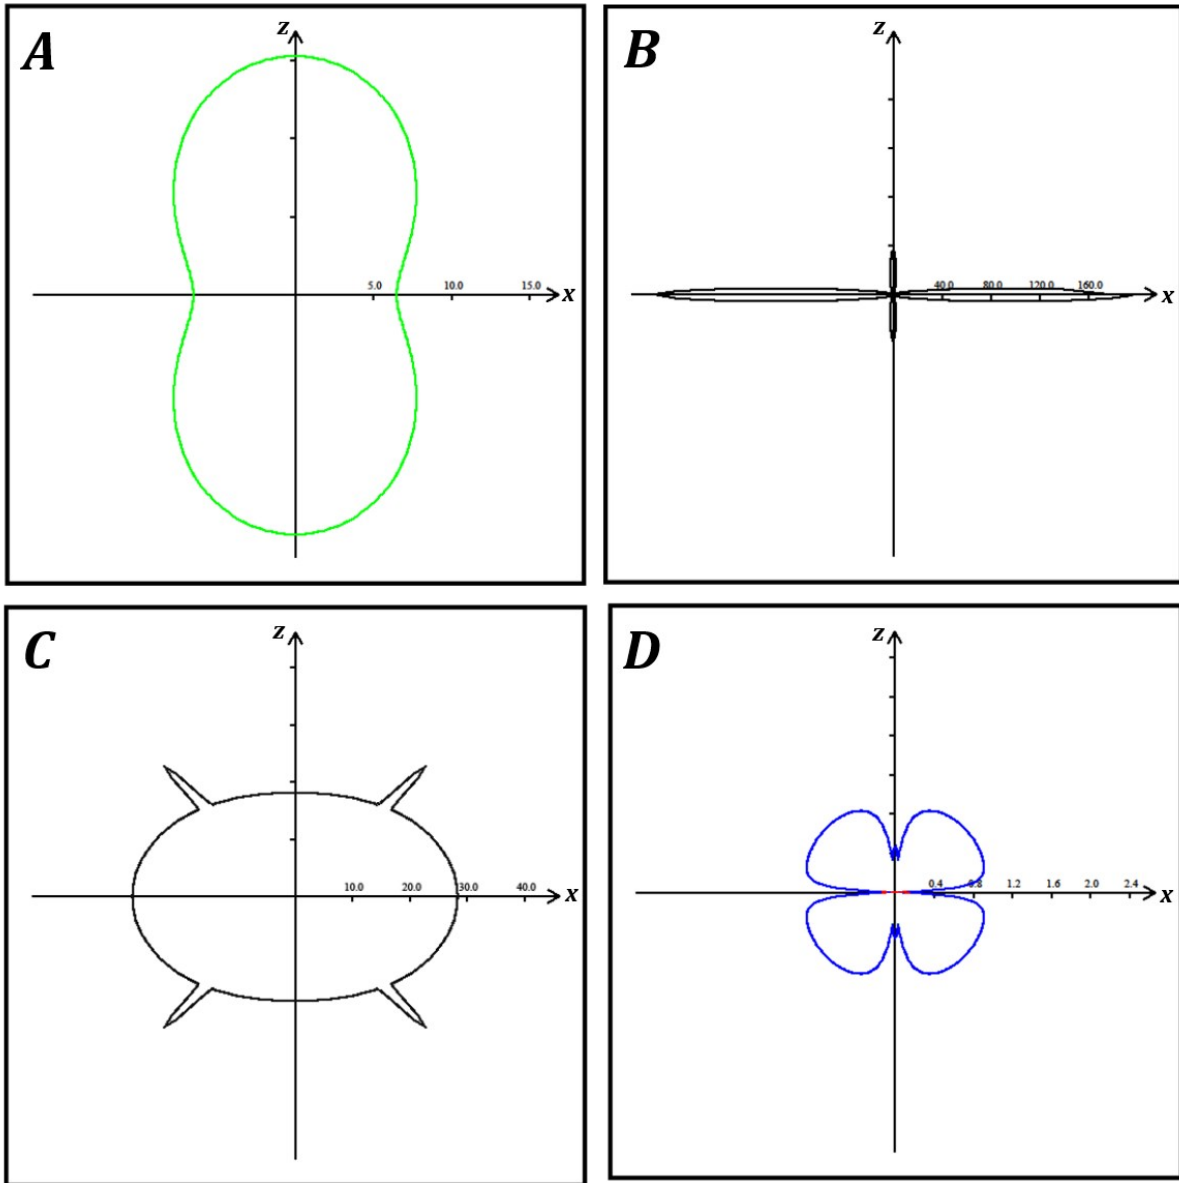

**Fig. S.2.** Two-dimensional projections in the  $xz$  plane of the tridimensional representations of the elastic properties of sharpite as a function of the orientation of the applied strain: (A) Compressibility; (B) Young modulus; (C) Maximum shear modulus; (D) Maximum (blue) and minimum (red) Poisson's ratio.

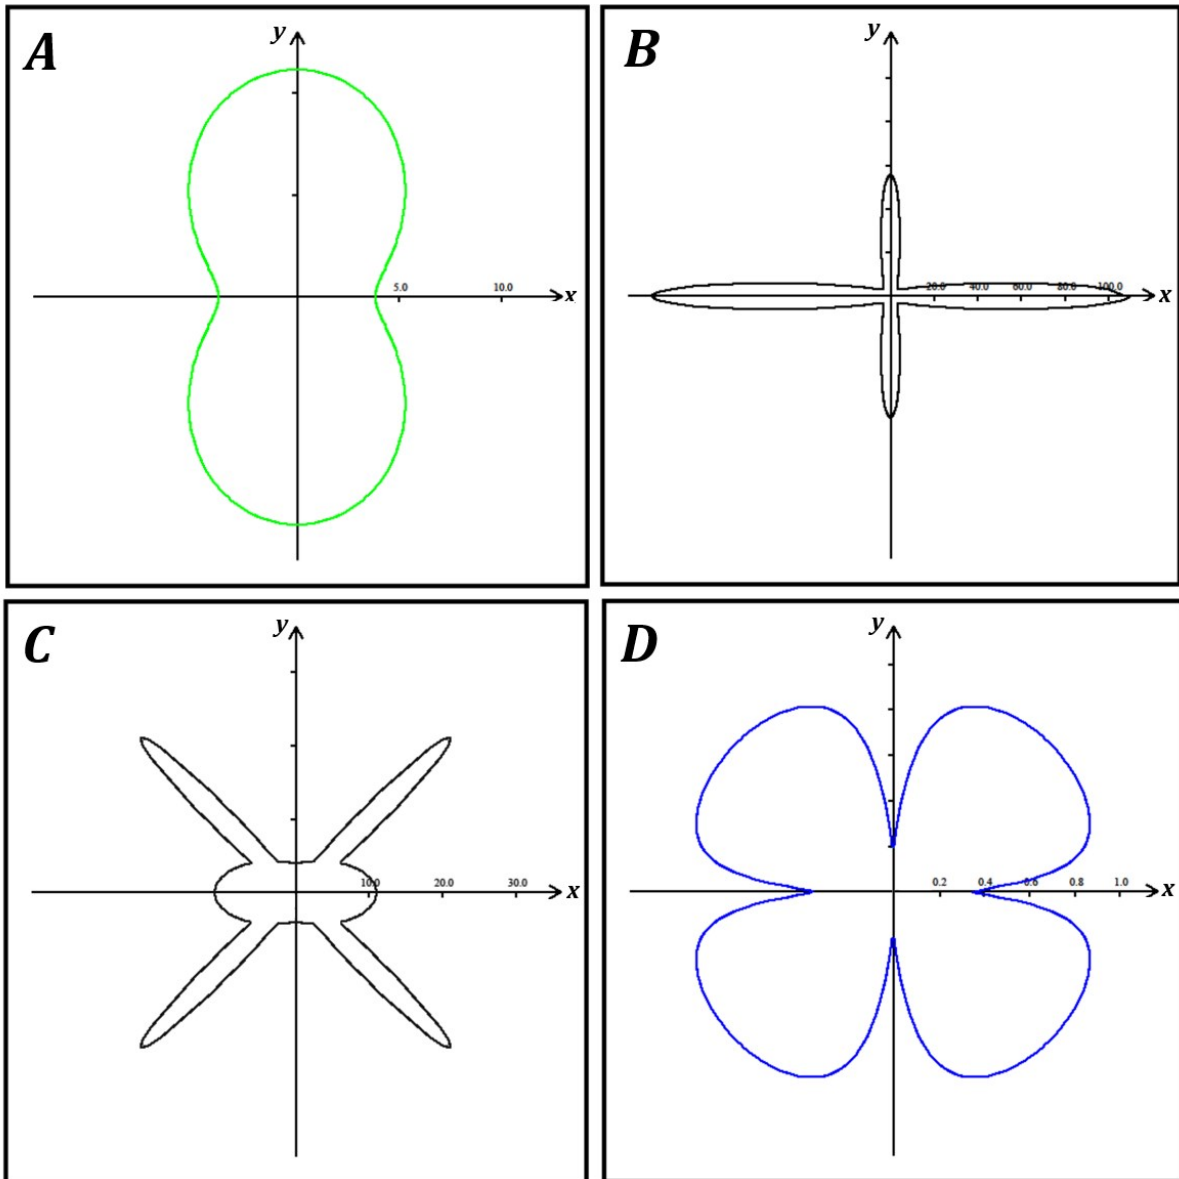

**Fig. S.3.** Two-dimensional projections in the  $xy$  plane of the tridimensional representations of the elastic properties of widenmannite as a function of the orientation of the applied strain: (A) Compressibility; (B) Young modulus; (C) Maximum shear modulus; (D) Maximum Poisson's ratio.



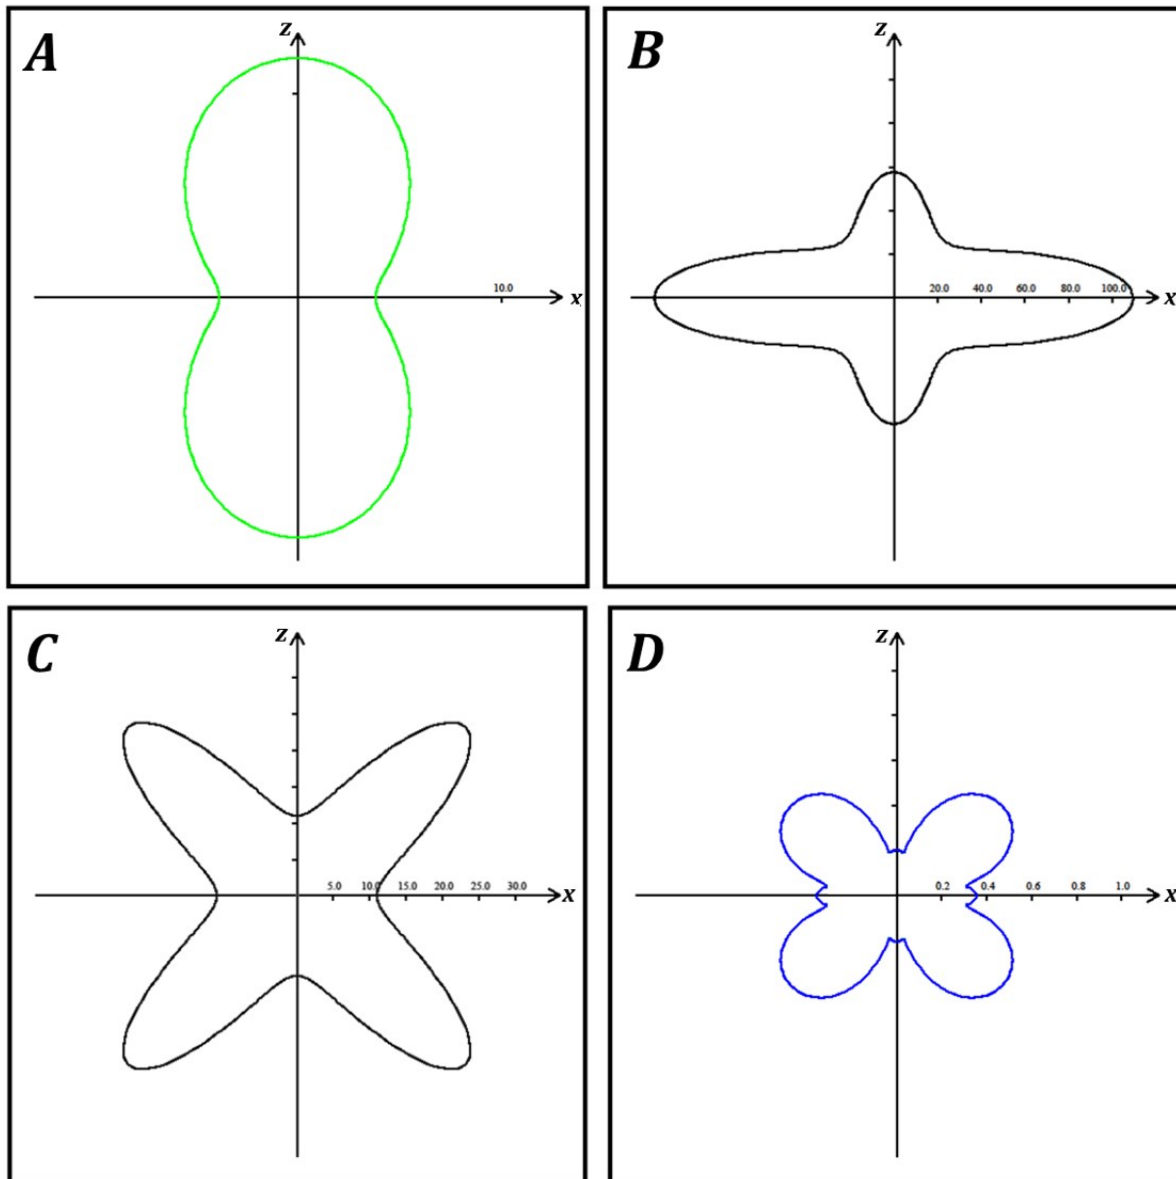

**Fig. S.4.** Two-dimensional projections in the  $xz$  plane of the tridimensional representations of the elastic properties of widenmannite as a function of the orientation of the applied strain: (A) Compressibility; (B) Young modulus; (C) Maximum shear modulus; (D) Maximum Poisson's ratio.

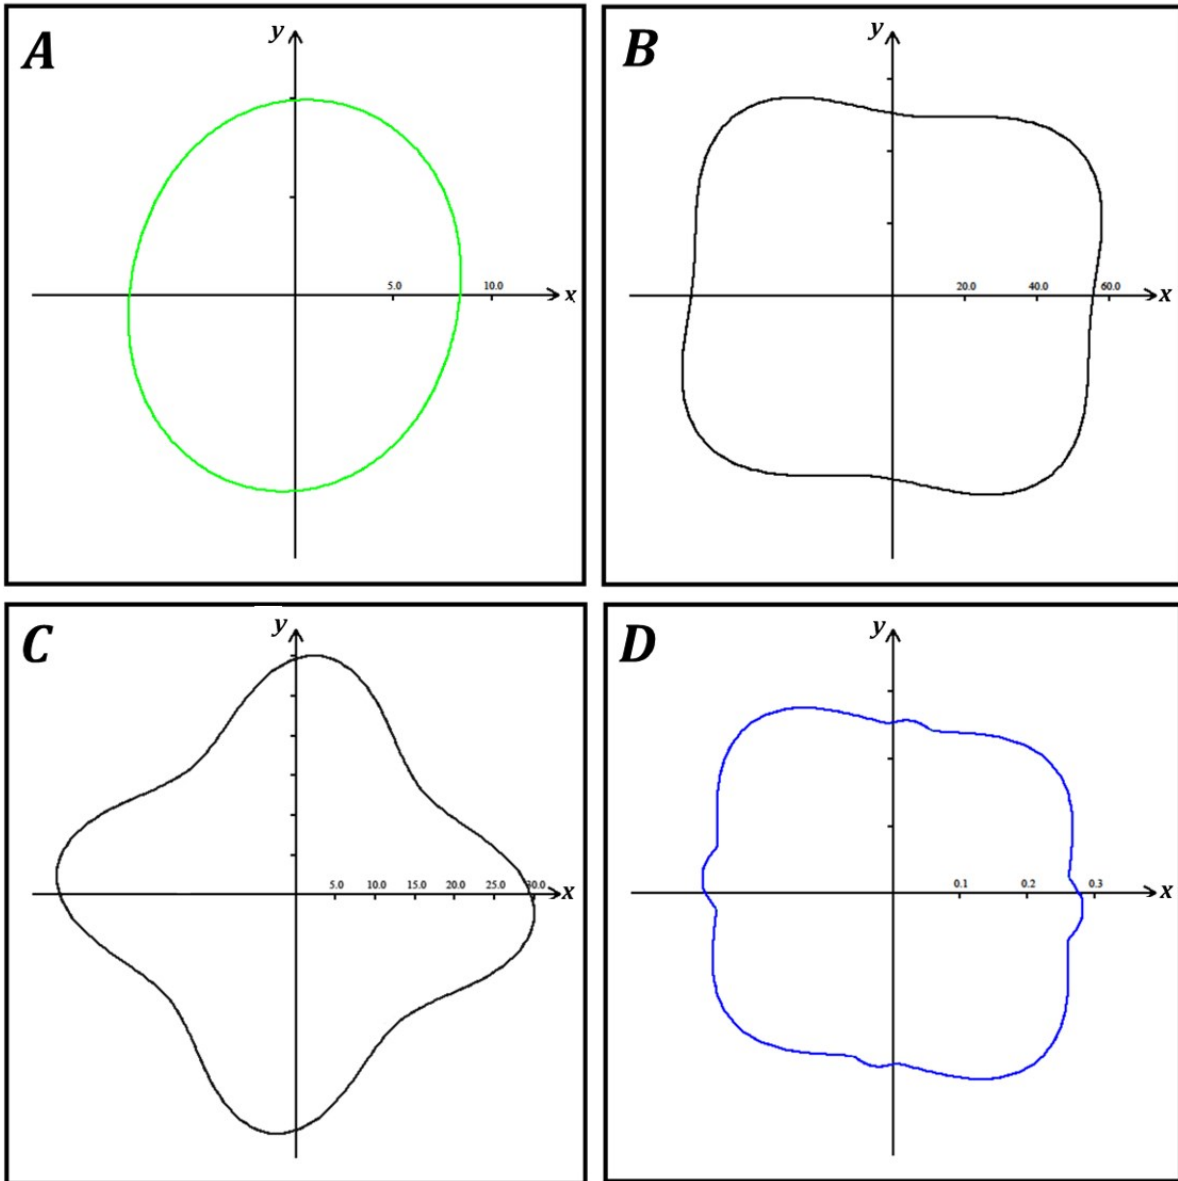

**Fig. S.5.** Two-dimensional projections in the  $xy$  plane of the tridimensional representations of the elastic properties of grimselite as a function of the orientation of the applied strain: (A) Compressibility; (B) Young modulus; (C) Maximum shear modulus; (D) Maximum Poisson's ratio.

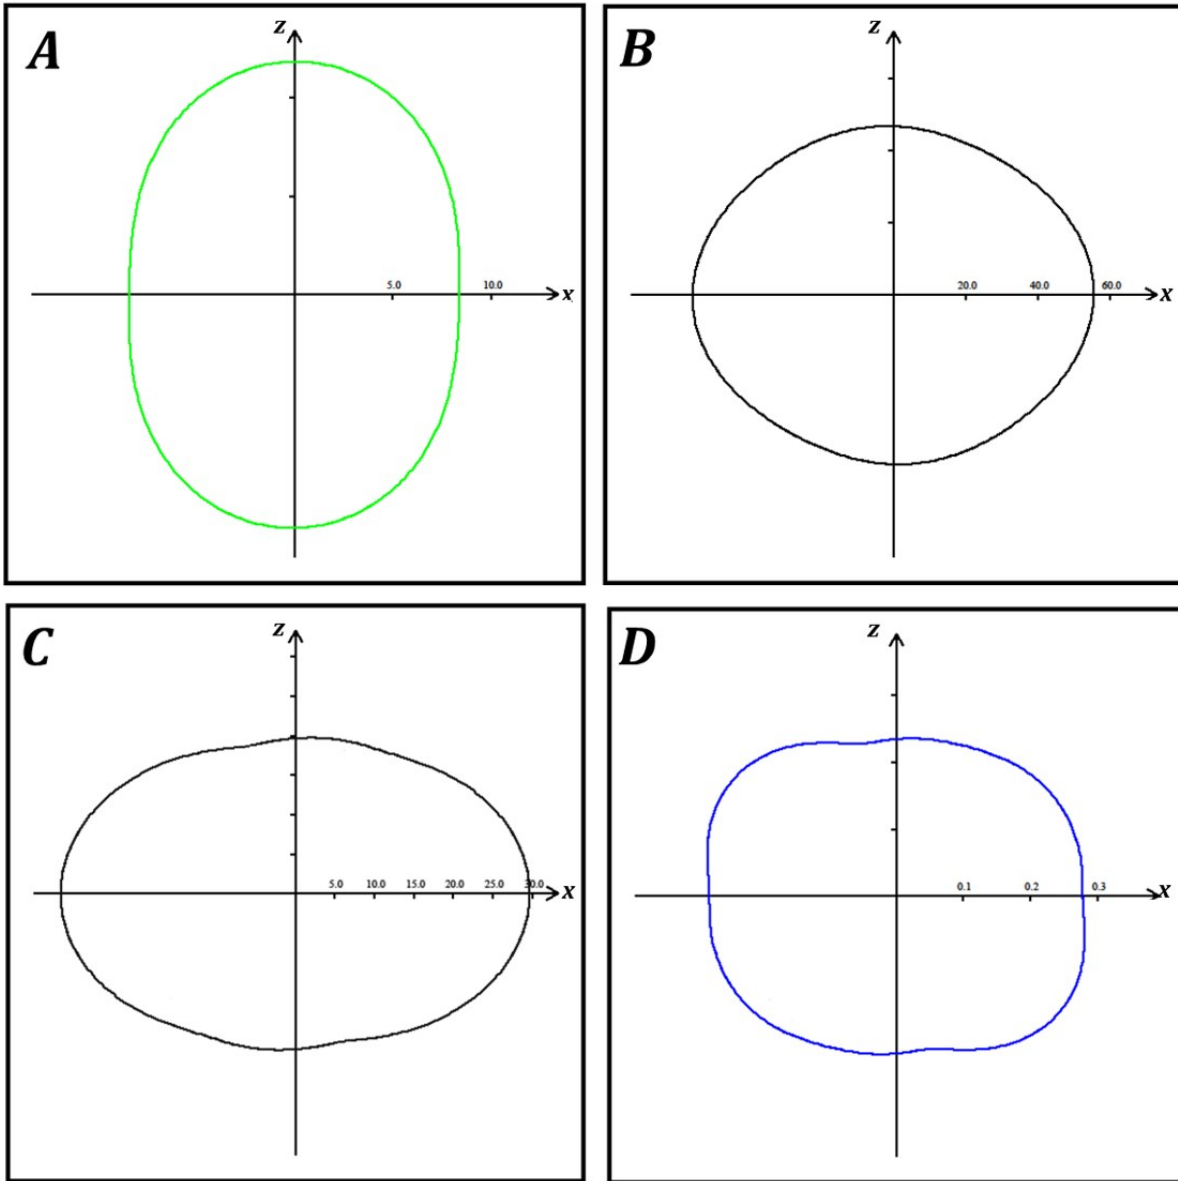

**Fig. S.6.** Two-dimensional projections in the  $xz$  plane of the tridimensional representations of the elastic properties of grimselite as a function of the orientation of the applied strain: (A) Compressibility; (B) Young modulus; (C) Maximum shear modulus; (D) Maximum Poisson's ratio.

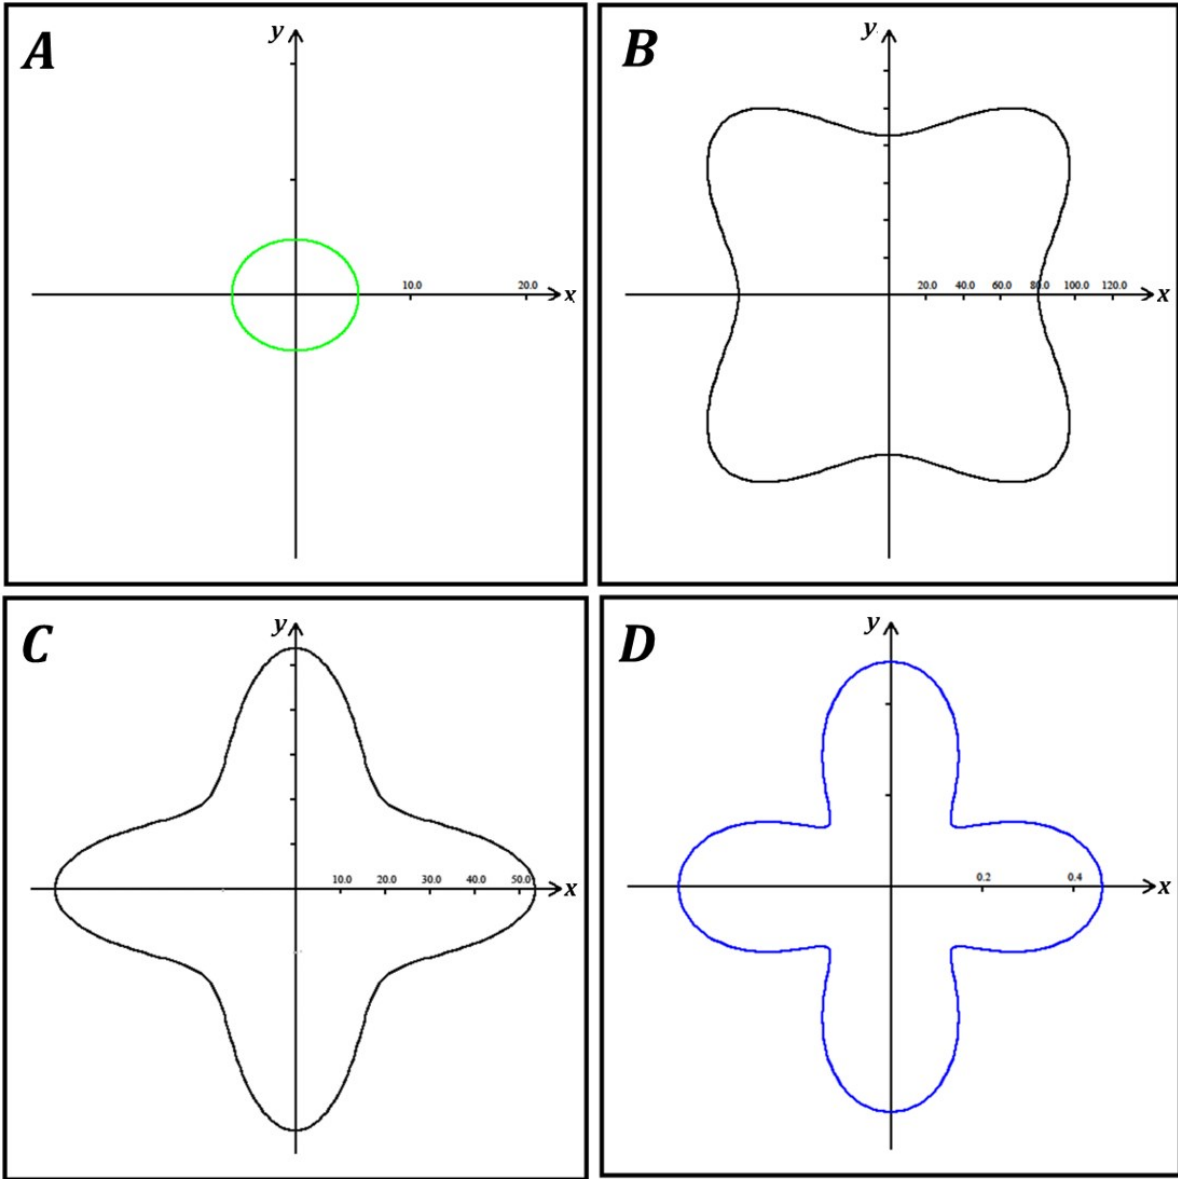

**Fig. S.7.** Two-dimensional projections in the  $xy$  plane of the tridimensional representations of the elastic properties of čejkaite as a function of the orientation of the applied strain: (A) Compressibility; (B) Young modulus; (C) Maximum shear modulus; (D) Maximum Poisson's ratio.

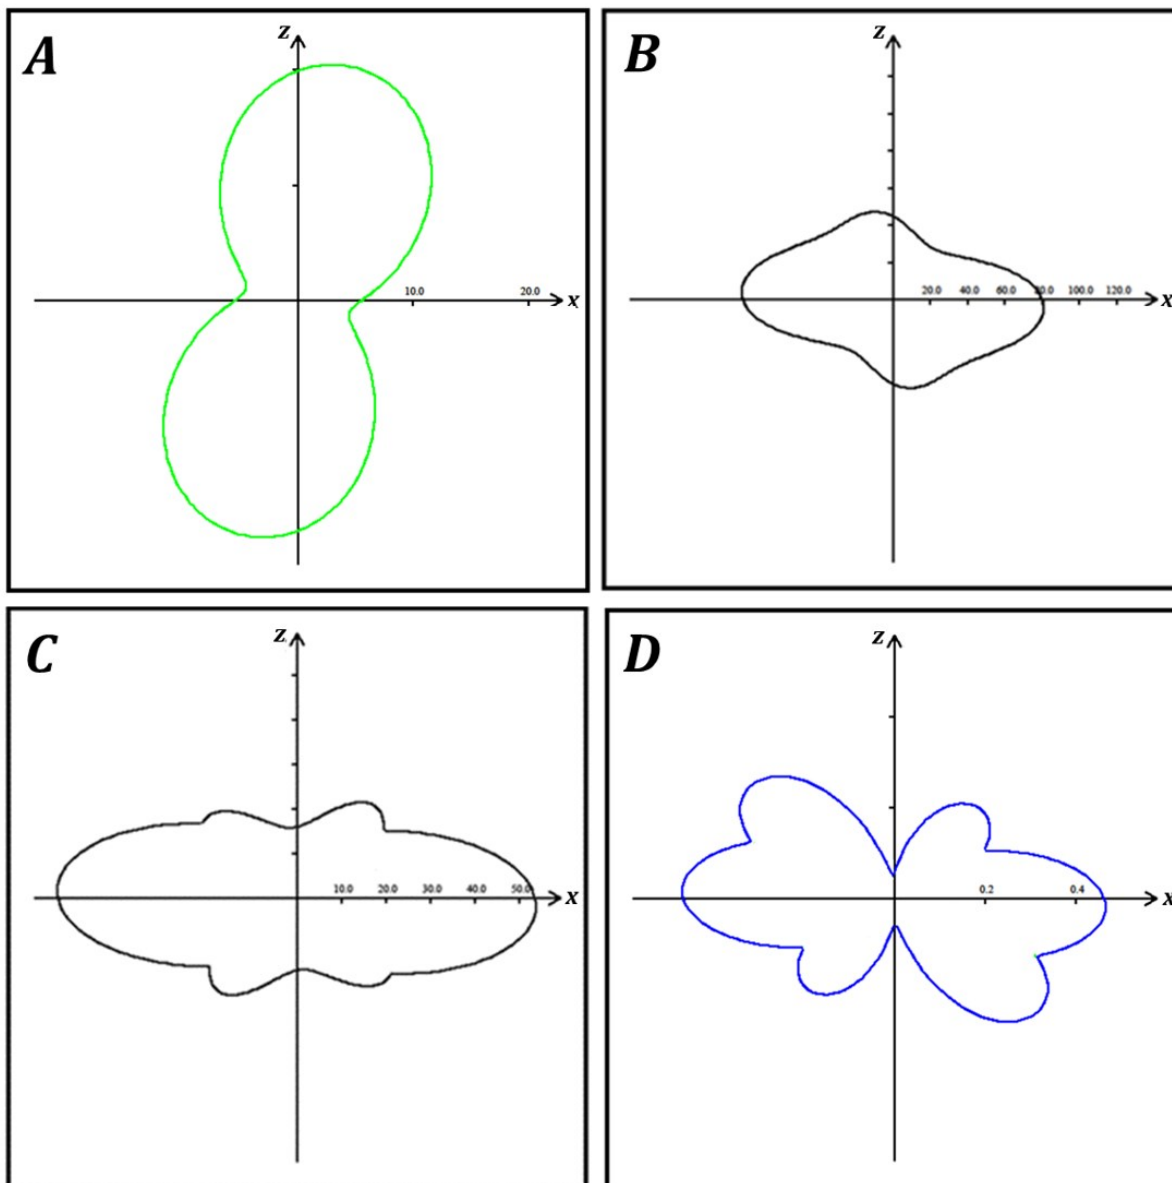

**Fig. S.8.** Two-dimensional projections in the  $xz$  plane of the tridimensional representations of the elastic properties of čejkaite as a function of the orientation of the applied strain: (A) Compressibility; (B) Young modulus; (C) Maximum shear modulus; (D) Maximum Poisson's ratio.

**Table S.20.** Unit cell volume and lattice parameters of roubaultite under the effect of different external anisotropic pressures applied along the direction of minimum compressibility.

| <b>P (GPa)</b> | <b>Vol. (<math>\text{\AA}^3</math>)</b> | <b>a (<math>\text{\AA}</math>)</b> | <b>b (<math>\text{\AA}</math>)</b> | <b>c (<math>\text{\AA}</math>)</b> | <b><math>\alpha</math> (deg)</b> | <b><math>\beta</math> (deg)</b> | <b><math>\gamma</math> (deg)</b> |
|----------------|-----------------------------------------|------------------------------------|------------------------------------|------------------------------------|----------------------------------|---------------------------------|----------------------------------|
| -0.0382        | 427.3044                                | 6.9453                             | 7.7712                             | 7.9436                             | 90.69                            | 91.73                           | 94.28                            |
| -0.0224        | 427.1795                                | 6.9421                             | 7.7807                             | 7.9353                             | 90.67                            | 91.73                           | 94.29                            |
| -0.0155        | 427.2545                                | 6.9403                             | 7.7860                             | 7.9337                             | 90.68                            | 91.71                           | 94.34                            |
| -0.0124        | 427.2554                                | 6.9405                             | 7.7887                             | 7.9308                             | 90.67                            | 91.71                           | 94.34                            |
| -0.0062        | 427.1576                                | 6.9397                             | 7.7903                             | 7.9283                             | 90.67                            | 91.72                           | 94.34                            |
| 0.0007         | 427.0907                                | 6.9385                             | 7.7951                             | 7.9235                             | 90.65                            | 91.72                           | 94.34                            |
| 0.0167         | 427.0634                                | 6.9374                             | 7.8010                             | 7.9183                             | 90.65                            | 91.72                           | 94.35                            |
| 0.0225         | 427.0274                                | 6.9369                             | 7.8032                             | 7.9161                             | 90.64                            | 91.71                           | 94.36                            |
| 0.0551         | 426.8094                                | 6.9359                             | 7.8064                             | 7.9098                             | 90.61                            | 91.74                           | 94.35                            |

**Table S.21.** Calculated compressibilities ( $k_V = -1/V \cdot (\partial V / \partial P)_P$ ) of roubaultite for different external anisotropic pressures applied along the direction of minimum compressibility.

| <b>P (GPa)</b> | $k_V(TPa^{-1})$ | <b>P (GPa)</b> | $k_V(TPa^{-1})$ |
|----------------|-----------------|----------------|-----------------|
| -0.035         | 19.633          | -0.015         | -12.634         |
| -0.030         | 27.453          | -0.010         | 37.671          |
| -0.025         | 11.788          | -0.005         | 29.589          |
| -0.020         | -23.897         | 0.000          | 14.084          |
| -0.0173        | -33.958         | 0.005          | 3.066           |

**Table S.22.** Unit cell volume and lattice parameters of fontanite under the effect of different external anisotropic pressures applied along the direction of minimum compressibility.

| <b>P (GPa)</b> | <b>Vol. (<math>\text{\AA}^3</math>)</b> | <b>a (<math>\text{\AA}</math>)</b> | <b>b (<math>\text{\AA}</math>)</b> | <b>c (<math>\text{\AA}</math>)</b> | <b><math>\alpha</math> (deg)</b> | <b><math>\beta</math> (deg)</b> | <b><math>\gamma</math> (deg)</b> |
|----------------|-----------------------------------------|------------------------------------|------------------------------------|------------------------------------|----------------------------------|---------------------------------|----------------------------------|
| -0.0806        | 1834.8349                               | 6.9427                             | 17.4221                            | 15.1699                            | 90.03                            | 89.53                           | 89.88                            |
| -0.0150        | 1828.9763                               | 6.9449                             | 17.4806                            | 15.0661                            | 90.00                            | 89.53                           | 89.97                            |
| -0.0031        | 1827.3408                               | 6.9474                             | 17.4875                            | 15.0412                            | 90.01                            | 89.53                           | 89.96                            |
| 0.0018         | 1842.9043                               | 6.9644                             | 17.4162                            | 15.1947                            | 89.99                            | 89.36                           | 89.91                            |
| 0.0191         | 1842.3470                               | 6.9655                             | 17.4199                            | 15.1844                            | 89.99                            | 89.36                           | 89.91                            |
| 0.0352         | 1842.0804                               | 6.9655                             | 17.4206                            | 15.1816                            | 89.99                            | 89.36                           | 89.91                            |
| 0.0370         | 1842.0410                               | 6.9655                             | 17.4209                            | 15.1811                            | 89.99                            | 89.37                           | 89.91                            |
| 0.0661         | 1841.3159                               | 6.9664                             | 17.4217                            | 15.1725                            | 89.99                            | 89.36                           | 89.91                            |
| 0.0671         | 1841.3050                               | 6.9664                             | 17.4219                            | 15.1722                            | 89.99                            | 89.36                           | 89.91                            |
| 0.0786         | 1841.0487                               | 6.9666                             | 17.4225                            | 15.1692                            | 89.99                            | 89.36                           | 89.91                            |



**Table S.23.** Calculated compressibilities ( $k_V = -1/V \cdot (\partial V / \partial P)_P$ ) of fontanite under the effect of different external anisotropic pressures applied along the direction of minimum compressibility.

| <b>P (GPa)</b> | $k_V(TPa^{-1})$ | <b>P (GPa)</b> | $k_V(TPa^{-1})$ | <b>P (GPa)</b> | $k_V(TPa^{-1})$ |
|----------------|-----------------|----------------|-----------------|----------------|-----------------|
| -0.050         | 47.237          | -0.010         | 74.528          | 0.022          | 10.611          |
| -0.045         | 50.638          | -0.005         | 77.955          | 0.027          | 9.073           |
| -0.040         | 54.042          | -0.003         | 79.327          | 0.032          | 8.275           |
| -0.035         | 57.448          | 0.000          | -1431.168       | 0.037          | 8.217           |
| -0.030         | 60.858          | 0.002          | 24.161          | 0.042          | 8.900           |
| -0.025         | 64.270          | 0.007          | 19.664          | 0.050          | 11.533          |
| -0.020         | 67.686          | 0.012          | 15.907          | -              | -               |
| -0.015         | 71.106          | 0.017          | 12.889          | -              | -               |

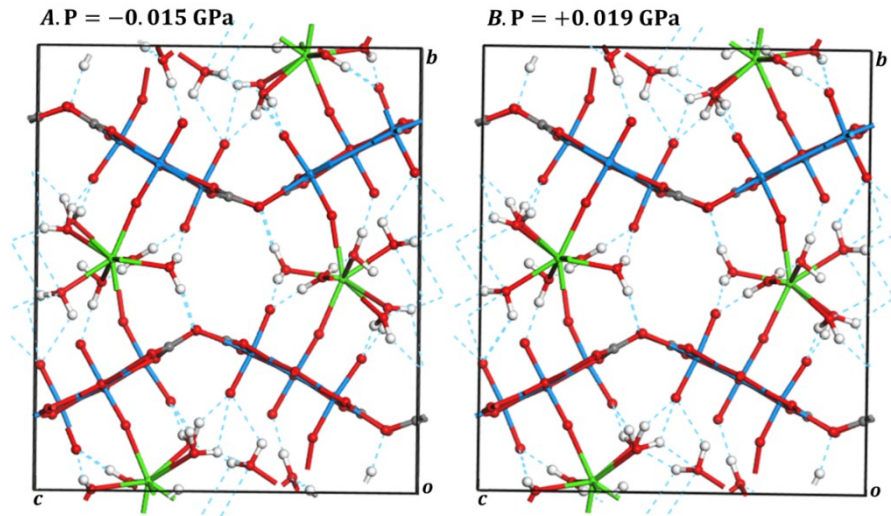

**Fig. S.9.** Views of the computed unit cell of fontanite from [100] under the effect of two different anisotropic pressures applied along the direction of minimum compressibility: (A)  $P = -0.015$  GPa; (B)  $P = +0.019$  GPa.

**Table S.24.** Unit cell volume and lattice parameters of sharpite under the effect of different external isotropic pressures.

| <b>P (GPa)</b> | <b>Vol. (<math>\text{\AA}^3</math>)</b> | <b>a (<math>\text{\AA}</math>)</b> | <b>b (<math>\text{\AA}</math>)</b> | <b>c (<math>\text{\AA}</math>)</b> |
|----------------|-----------------------------------------|------------------------------------|------------------------------------|------------------------------------|
| -0.9960        | 1814.4864                               | 5.0328                             | 15.9731                            | 22.5710                            |
| -0.7413        | 1784.9822                               | 5.0229                             | 15.8416                            | 22.4328                            |
| -0.5158        | 1765.9490                               | 5.0162                             | 15.7738                            | 22.3184                            |
| -0.2479        | 1749.0213                               | 4.9932                             | 15.7664                            | 22.2170                            |
| 0.0017         | 1735.2999                               | 4.9836                             | 15.7296                            | 22.1367                            |
| 0.1248         | 1729.7926                               | 4.9857                             | 15.6946                            | 22.1062                            |
| 0.2554         | 1723.8019                               | 5.0018                             | 15.6166                            | 22.0684                            |
| 0.4997         | 1710.4719                               | 4.9961                             | 15.5514                            | 22.0148                            |
| 0.7436         | 1694.9453                               | 4.9895                             | 15.4792                            | 21.9457                            |
| 0.9886         | 1677.9576                               | 4.9816                             | 15.3834                            | 21.8956                            |

**Table S.25.** Calculated compressibilities ( $k_a = -1/a \cdot (\partial a / \partial P)_P$ ) of sharpite for different external isotropic pressures.

| <b>P (GPa)</b> | $k_V(TPa^{-1})$ | <b>P (GPa)</b> | $k_V(TPa^{-1})$ | <b>P (GPa)</b> | $k_V(TPa^{-1})$ |
|----------------|-----------------|----------------|-----------------|----------------|-----------------|
| -0.450         | 18.166          | -0.100         | 6.450           | 0.200          | -20.213         |
| -0.400         | 18.627          | -0.050         | 3.998           | 0.250          | -8.038          |
| -0.350         | 17.918          | 0.000          | 1.371           | 0.300          | 0.107           |
| -0.300         | 16.300          | 0.050          | -1.925          | 0.350          | 5.069           |
| -0.250         | 14.075          | 0.100          | -6.697          | 0.400          | 7.607           |
| -0.200         | 11.547          | 0.150          | -14.111         | 0.450          | 8.392           |
| -0.150         | 8.959           | 0.185          | -22.322         | -              | -               |

## References

- 1 D. Ginderow, F. Cesbron, Structure de la roubaultite,  $Cu_2(UO_2)_3(CO_3)_2O_2(OH)_2 \cdot 4 H_2O$ , *Acta Crystallogr. C*, 1985, **41**, 654.
- 2 K. A. Hughes, P. C. Burns, A new uranyl carbonate sheet in the crystal structure of fontanite,  $Ca[(UO_2)_3(CO_3)_2O_2] \cdot (H_2O)_6$ , *Am. Mineral.*, 2003, **88**, 962.
- 3 J. Plášil, A unique structure of uranyl-carbonate mineral sharpite: A derivative of the rutherfordine topology, *Z. Kristallogr.*, 2018, **233**, 579.
- 4 J. Plášil, L. Palatinus, J. Rohlíček, L. Houdková, M. Klementová, V. Goliáš, P. Škacha, Crystal structure of lead uranyl carbonate mineral widenmannite: Precession electron-diffraction and synchrotron powder-diffraction study, *Am. Mineral.*, 2014, **99**, 276.
- 5 J. Plášil, K. Fejfarová, R. Skála, R. Škoda, N. Meisser, J. Hloušek, I. Císařová, M. Dušek, F. Veselovský, J. Čejka, J. Sejkora, P. Ondruš, The crystal chemistry of the uranyl carbonate mineral grimselite,  $(K,Na)_3Na[(UO_2)(CO_3)_3] \cdot (H_2O)$ , from Jáchymov, Czech Republic, *Mineral. Mag.*, 2012, **76**, 443.
- 6 J. Plášil, K. Fejfarová, M. Dušek, R. Škoda, J. Rohlíček, Revision of the symmetry and the crystal structure of čejkaite,  $Na_4[(UO_2)(CO_3)_3]$ , *Am. Mineral.*, 2013, **98**, 549.
